# Supplementary material
Source: MDPI journal article supplement (https://www.mdpi.com/2073-4395/12/9/2135)
Supplement: s1 [file s1]

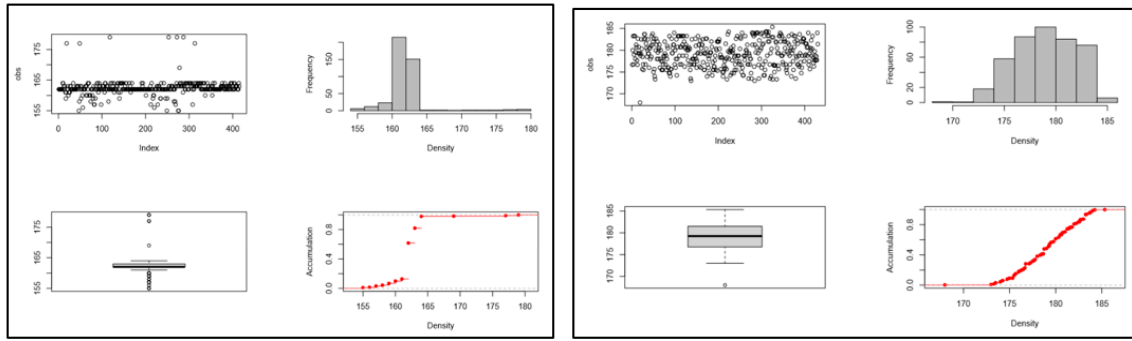

A. DH

B. DMW

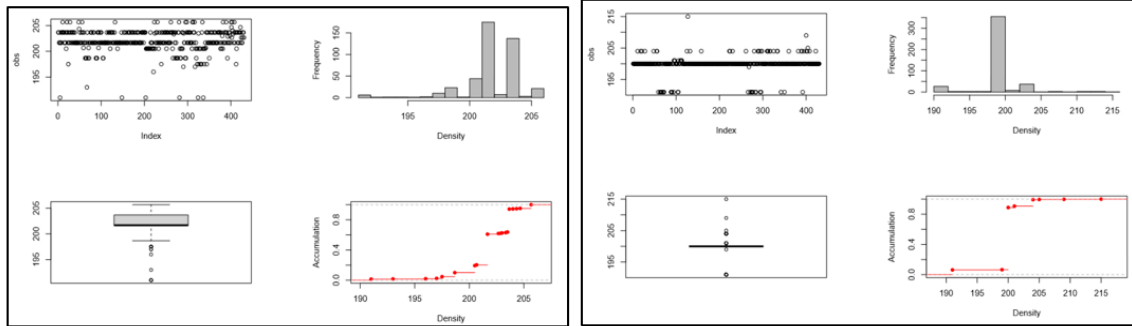

C. DM

D. DPH

**Figure S1.** Frequency distribution of the barley accessions based on phenological stages. (A) plants at tillage stage (DH), (B) plants at milky-waxy (DMW), (C) plants at maturity stage (DM), (D) plants at harvest stage (DPH).

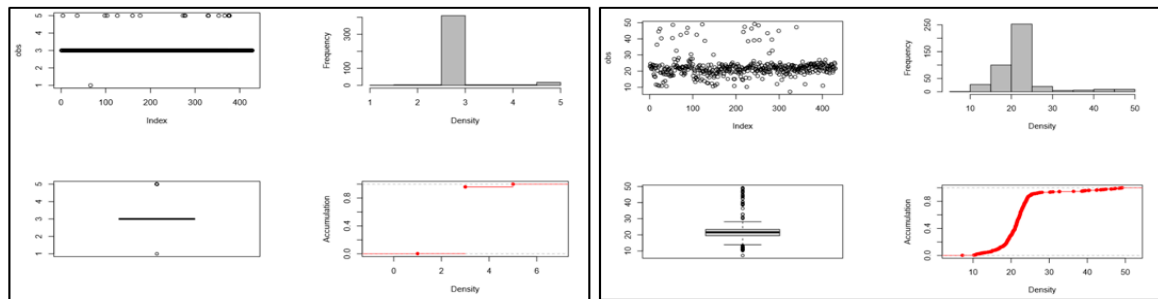

A. SD

B. NGS

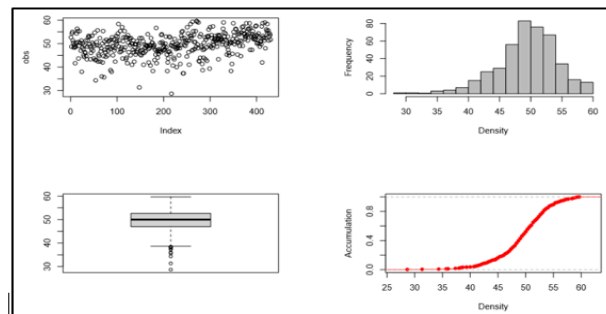

C. TGW

**Figure S2.** Frequency distribution of the barley accessions based on the spike and seeds traits. (A) spike density, (B) grain per spike (NGS), (C) 1000-grain weight (TGW).

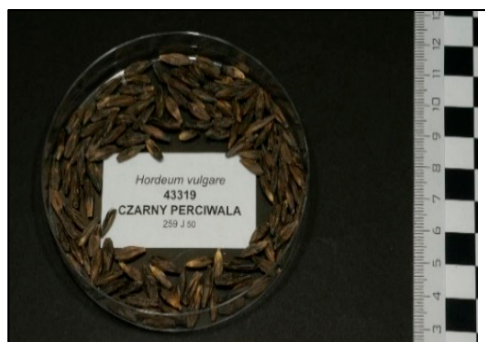

A1

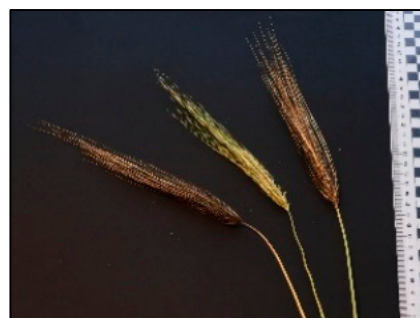

A2

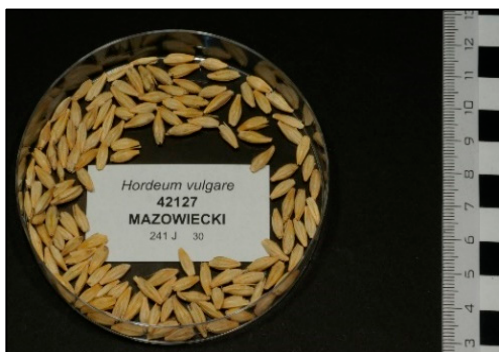

B1

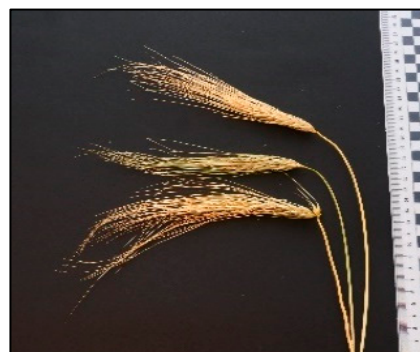

B2

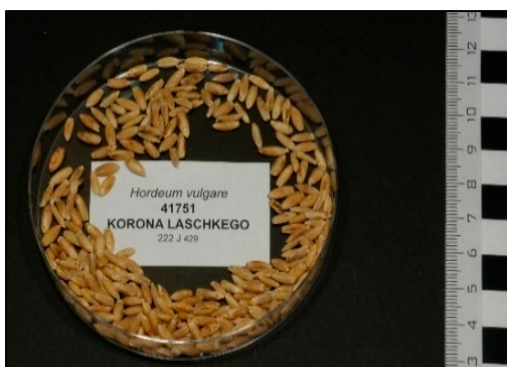

C1

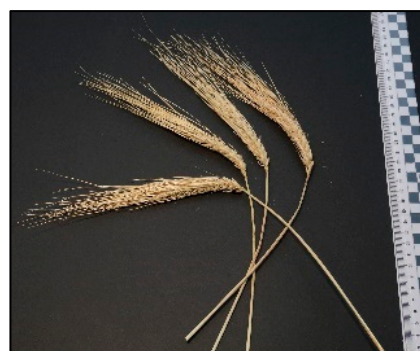

C2

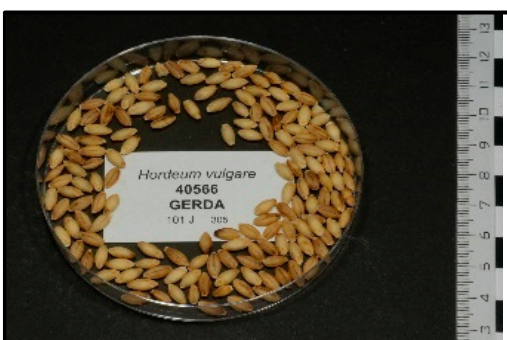

D1

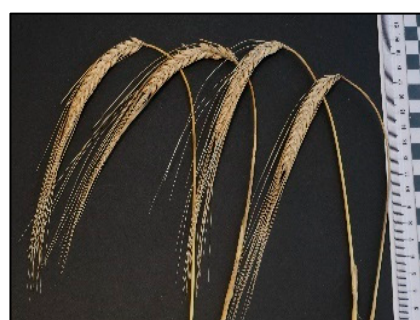

D2

**Figure S3.** Variability in spike shape and density, awn types and grain. Grains and spikes: (A1,A2) Czarny Preciwciala, (B1,B2) Mazowiecki, (C1,C2) Korona Lachskiego, (D1,D2) Gerda.
