# Supplementary material
Source: MDPI journal article supplement (https://www.mdpi.com/2073-4395/12/9/2135)
Supplement: s1 [file s1 › Table S1.xlsx]

## Sheet: Suppl. Table S1
Supplementary Table S1. Phenotypic data collected for the GWAS panel across 2018 – 2019.
							2019															2018
nr	OTHERNUMB	accesion number (ACCENUMB)	Accession name (ACCENAME)	country of origin (ORIGCTY)	group 1	Acquisition date (ACQDATE)	Days to tillering (DAY_TIL)	days to milk (DAY_MILK)	days to maturity (DAY_MAT)	days to maturity 2 - harvest (DAY_HARVEST)	Plants height (cm) (PLT_HGT)	Lodging (LODG)	Row number (ROW_NUM)	seeds per spike (SPIKE_SEED)	TSW	lemma awn/hood (LEMMA_AWN)	spike density (SPIKE_DEN)	Kernel covering (SED_COV)	glume colour (GLUM_CLR 1)	glume colour (GLUM_CLR 2)	seed colour (SED_CLR)	Lodging (LODG)	days to milk (DAY_MILK)	days to maturity (DAY_MAT)	Plants height (cm) (PLT_HGT)	spike length (SPIK_LENGTH) mm
POL003: 215 J	POL003: 215 J	41692	HANNA GAMBRINUS	POL	IA	1953----	162	173	191	200	95	9	1	20.9667	43.6667	3	3	3	1	1	1	4	177	210	91
POL003: 241 J	POL003: 241 J	42127	MAZOWIECKI	POL	IA	1953----	157	173	191	200	89	9	5	46.3333	41.3333	3	3	3	1	1	1	4	175.333	207	72	59.9897
POL003: 210 J	POL003: 210 J	41572	ANTONINSKI BROWARNY	POL	IA	1953----	162	173	191	200	92	9	1	18.7333	53	3	3	3	1	1	1	6	182	210	83
POL003: 229 J	POL003: 229 J	41907	PUCKI	POL	IA	1956----	162	180	197	204	90	9	1	21.7667	52	3	3	3	1	1	1	6	185.667	210	69.6667	72.432
POL003: 236 J	POL003: 236 J	42060	PULAWSKI BROWARNY	POL	IA	1956----	162	173	191	200	90	9	1	15.6333	48.3333	3	3	3	1	1	1	4	175.333	207	83	71.4664
POL003: 230 J	POL003: 230 J	41908	PULAWSKI WCZESNY	POL	IA	1956----	159	173	191	200	85	9	1	10.2	49.6667	3	3	3	1	1	1	6	179.667	210	81
POL003: 231 J	POL003: 231 J	41916	REFLEKS	POL	IA	1956----	160	171	191	200	82	9	1	22.3667	48.3333	3	3	3	1	1	1	4	182.333	207	63.6667	50.3121
POL003: 234 J	POL003: 234 J	42034	BORYNA	POL	IA	1956----	162	173	191	200	88	9	1	22.1333	50	3	3	3	1	1	1	6	183	210	79.6667	77.9716
POL003: 232 J	POL003: 232 J	41924	SANDOMIERSKI	POL	IA	1958----	160	171	191	200	77	9	1	20.1333	47.6667	3	3	3	1	1	1	8	183	210	72.3333	81.94
POL003: 235 J	POL003: 235 J	42042	BROWARNY PZHR	POL	IA	1960----	162	180	197	204	89	9	1	23.1	48	3	3	3	1	1	1	4	179.667	210	75.3333	84.5834
POL003: 214 J	POL003: 214 J	41691	HANNA BORZYMOWICKI	POL	IA	1961----	160	173	191	200	95	9	1	19.5667	42	3	3	3	1	1	1	4	181	210	52.5
POL003: 216 J	POL003: 216 J	41693	HANNA GOLI	POL	IA	1961----	162	171	191	200	95	9	1	16.6333	46.3333	3	3	3	1	1	1	4	177	210	82
POL003: 218 J	POL003: 218 J	41695	HANNA SKRZESZOWICKI	POL	IA	1961----	162	176	191	200	92	9	1	22.5	46.6667	3	3	3	1	1	1	4	177	210	87
POL003: 222 J	POL003: 222 J	41751	KORONA LASCHKEGO	POL	IA	1961----	162	176	191	200	80	9	5	44.2333	28.6667	3	3	1	1	1	1	6	187	210	55
POL003: 188 J	POL003: 188 J	41474	KUJAWIAK	POL	IA	1961----	162	179	191	200	90	9	1	22.6333	45.3333	3	3	3	1	1	1	6	179.667	207	83.3333	89.0953
POL003: 189 J	POL003: 189 J	41475	KUTNOWSKI	POL	IA	1961----	162	179	191	200	98	9	1	19.9	56.6667	3	3	3	1	1	1	4	185	210	78.6667	75.9686
POL003: 225 J	POL003: 225 J	41784	MARKOWICKI	POL	IA	1961----	157	171	191	200	93	9	5	47.4	40.6667	3	3	3	1	1	1	4	174.5	210	72.5
POL003: 228 J	POL003: 228 J	41905	PRZEWORSKI	POL	IA	1961----	162	180	197	204	65	9	1	15.9333	43.3333	3	3	3	1	1	1	4	179.667	210	73	81.3354
POL003: 242 J	POL003: 242 J	42129	PUTZA	POL	IA	1961----	162	173	191	200	80	9	1	22.2333	49.3333	3	3	3	1	1	1	5	180.333	207	83	63.9651
POL003: 243 J	POL003: 243 J	42130	SOBIESZYNSKI	POL	IA	1961----	163	176	191	200	85	9	1	20.1333	53.3333	3	3	3	1	1	1	5	175.333	207	72.6667	65.8419
POL003: 233 J	POL003: 233 J	42007	WIELORYB Z PODHOREC	POL	IA	1961----	156	171	191	200	88	9	5	38.5667	40	3	3	3	1	1	1	4	175.333	207	80.6667	69.4369
POL003: 171 J	POL003: 171 J	41323	CESARSKI STIEGLERA	POL	IA	1961----	162	176	191	200	85	9	1	21.2667	54	3	3	3	1	1	1	7	181	210	83.6667	58.4191
POL003: 259 J	POL003: 259 J	43319	CZARNY PERCIWALA	POL	IA	1961----	159	176	191	200	85	9	5	39.2333	46.3333	3	3	3	4	4	4	4	174.5	207	57	46.4903
POL003: 240 J	POL003: 240 J	42125	DANUBIA CIOLKOWSKI	POL	IA	1961----	163	173	191	200	93	9	1	24.4	48	3	3	3	1	1	1	5	185	210	72	74.6608
POL003: 172 J	POL003: 172 J	41328	GRYF	POL	IA	1971----	162	176	191	200	80	9	1	24.1	47.6667	3	3	3	1	1	1	7	175.333	207	75.3333	50.1252
POL003: 224 J	POL003: 224 J	41769	LUBUSKI	POL	IA	1971----	163	173	191	200	85	9	1	21.1	50.3333	3	3	3	1	1	1	6	177	210	76.5
POL003: 226 J	POL003: 226 J	41886	PIAST	POL	IA	1971----	162	173	182	200	73	9	1	21.5333	48.6667	3	3	3	1	1	1	8	181	210	72
POL003: 209 J	POL003: 209 J	41570	ANTALEK	POL	IA	1971----	162	176	191	200	85	9	1	24.3	50	3	3	3	1	1	1	6	179.5	210	64
POL003: 239 J	POL003: 239 J	42124	DAMAZY	POL	IA	1971----	163	173	191	200	85	9	1	23.4667	51	3	3	3	1	1	1	6	182.333	207	63.3333
POL003: 46 J	POL003: 46 J	40306	ELKA HILDEBRANDA	POL	IA	1972----	162	173	191	200	85	9	1	19.3333	53	3	3	3	1	1	1	4	183	207	72.6667	58.891
POL003: 173 J	POL003: 173 J	41329	KOSMOS	POL	IA	1972----	162	176	191	200	80	9	1	23.8333	42	3	3	3	1	1	1	7	175.333	207	74.3333	56.4594
POL003: 65 J	POL003: 65 J	40385	N 11	POL	IA	1972----	162	179	191	200	95	9	1	25.5667	45.3333	3	3	3	1	1	1	6	179.667	210	76.6667	83.7882
POL003: 71 J	POL003: 71 J	40410	POLNOCNY SWHN	POL	IA	1972----	162	173	182	191	100	9	1	22.0667	48	3	3	3	1	1	1	5	179.667	207	69.6667
POL003: 72 J	POL003: 72 J	40415	RAJSKI	POL	IA	1972----	162	171	182	191	75	9	1	28.1333	36	1	1	3	1	1	1		183	204	60	57.6838
POL003: 156 J	POL003: 156 J	41081	SLODOWY	POL	IA	1972----	164	179	191	200	75	9	1	22.3667	47	3	3	3	1	1	1	6	177	207	74.3333	62.1993
POL003: 84 J	POL003: 84 J	40457	SZELEJEWSKI	POL	IA	1972----	160	176	191	200	105	9	1	17.5667	48.3333	3	3	3	1	1	1	5	179.667	207	74.6667	53.1119
POL003: 86 J	POL003: 86 J	40460	TERESA	POL	IA	1972----	162	173	191	200	105	9	1	20.1	47	3	3	3	1	1	1	5	179.667	207	82.6667	73.4656
POL003: 161 J	POL003: 161 J	41233	WANDA	POL	IA	1972----	162	176	191	200	85	9	1	12.0333	51	3	3	3	1	1	1	7	183	207	65.3333	60.62
POL003: 91 J	POL003: 91 J	40490	DLUZEWSKI	POL	IA	1972----	159	173	191	200	90	9	5	43.7333	38.6667	3	3	3	1	1	1	5	175.333	207	66	60.1001
POL003: 7 J	POL003: 7 J	40023	POLONEZ	POL	IA	1974----	162	176	191	200	92	9	1	23.2333	54.3333	3	3	3	1	1	1	8	185.667	207	63.6667	49.0653
POL003: 223 J	POL003: 223 J	41768	LUBICKI	POL	IA	1977----	162	173	191	200	80	9	1	19.3667	49	3	3	3	1	1	1	8	179.667	207	65	79.4262
POL003: 96 J	POL003: 96 J	40556	POLON	POL	IA	1978----	159	173	191	200	80	9	1	26.4	45	3	3	3	1	1	1	8	177	207	70	51.1861
POL003: 169 J	POL003: 169 J	41283	RYBICIK	POL	IA	1978----	164	173	191	200	85	9	1	18.8667	48.6667	3	3	3	1	1	1	4	185.667	210	82	60.07
POL003: 187 J	POL003: 187 J	41463	HANNA KLESZCZEWSKI	POL	IA	1981----	162	179	191	200	90	9	1	21.3333	47.3333	3	3	3	1	1	1	6	179.667	207	83.3333	64.4071
POL003: 190 J	POL003: 190 J	41479	LUBICKI	POL	IA	1981----	162	176	191	200	75	9	1	21.6	41.6667	3	3	3	1	1	1	6	182.333	210	70.6667	57.5853
POL003: 151 J	POL003: 151 J	40940	JAREK	POL	IA	1982----	161	176	191	200	80	9	1	18.2333	50	3	3	3	1	1	1	6	179.667	207	75.3333	54.8618
POL003: 182 J	POL003: 182 J	41418	MAGO	POL	IA	1983----	164	173	191	200	70	9	1	23.0333	38.3333	3	3	3	1	1	1	8	177	207	63	70.0147
POL003: 183 J	POL003: 183 J	41419	ARS	POL	IA	1983----	162	173	191	200	75	9	1	20.1	49	3	5	3	1	1	1	8	179.667	207	67.6667	56.8395
POL003: 181 J	POL003: 181 J	41415	BIELIK	POL	IA	1983----	162	176	191	200	80	9	1	24	50.3333	3	3	3	1	1	1	8	179.667	210	71	64.1707
POL003: 255 J	POL003: 255 J	43056	RUDZIK	POL	IA	1988----	164	179	191	200	83	9	1	17	44.5	3	3	3	1	1	1	5	181	210	65	61.1792
POL003: 257 J	POL003: 257 J	43086	KLIMEK	POL	IA	1989----	162	176	191	200	80	9	5	48.3333	51.3333	3	3	3	1	1	1	6	186	210	54.5	69.0481
POL003: 385 J	POL003: 385 J	500666	EDGAR	POL	IB	2019	162	176	191	200	75	9	1	19.4667	58.6667	3	5	3	1	1	1	9	185.667	210	64.3333	65.182
POL003: 400 J	POL003: 400 J	19I00606	ELLA	POL	IB	2019	163	173	191	200	65	9	1	26.8667	52	3	3	3	1	1	1	8.2	177.033	208.8	64.5333	64.0607
POL003: 403 J	POL003: 403 J	19I00609	GRANAL	POL	IB	2019	164	179	191	200	80	9	1	22.8	51.6667	3	3	3	1	1	1	7.5	184	207	61.5	53.4154
POL003: 404 J	POL003: 404 J	19I00610	IRON	POL	IB	2019	162	176	191	200	75	9	1	25.3	52	3	3	3	1	1	1	9	186	210	62.75	57.1347
POL003: 406 J	POL003: 406 J	19I00612	KUCYK	POL	IB	2019	163	179	191	200	75	9	1	22	57.6667	3	3	3	1	1	1	8.5	177	207	68.1667	45.994
POL003: 417 J	POL003: 417 J	19I00623	NAGRADOWICKI	POL	IB	2019	164	179	191	200	77	9	1	23.3	49.6667	3	3	3	1	1	1	7	177	210	64.6667	60.0906
POL003: 418 J	POL003: 418 J	19I00624	NATASIA	POL	IB	2019	162	176	191	200	75	9	1	21.6	57.3333	3	3	3	1	1	1	9	180.333	210	68	62.0906
POL003: 420 J	POL003: 420 J	19I00626	OBEREK	POL	IB	2019	164	176	191	200	65	9	1	21.6333	58.6667	3	3	3	1	1	1		185	210	55	105.511
POL003: 423 J	POL003: 423 J	19I00629	PAUSTIAN	POL	IB	2019	162	176	191	200	70	9	1	21.1	52.6667	3	3	3	1	1	1	9	179.667	207	65.6667
POL003: 424 J	POL003: 424 J	19I00630	PENGUIN	POL	IB	2019	162	179	191	200	75	9	1	18.7667	51.3333	3	3	3	1	1	1	8	181	207	64	60.4698
POL003: 425 J	POL003: 425 J	19I00631	Podarek	POL	IB	2019	164	176	191	200	75	9	1	21.8333	59	3	3	3	1	1	1	9	185.667	210	72	55.5727
POL003: 426 J	POL003: 426 J	19I00632	POLONIA STAROPOLSKA	POL	IB	2019	164	176	191	200	70	9	1	23.2333	48	3	3	3	1	1	1	8.5	179.5	210	50.4444	47.3029
POL003: 386 J	POL003: 386 J	500667	RAMBO	POL	IB	2019	162	173	191	200	70	9	1	24.0667	53.6667	3	5	3	1	1	1	9	173.667	207	65	67.7501
POL003: 428 J	POL003: 428 J	19I00634	RASKUD	POL	IB	2019	163	176	191	200	90	9	1	23.8667	56	3	3	3	1	1	1	7.5	176.417	207	63.5833	63.7539
POL003: 431 J	POL003: 431 J	19I00637	RINGO	POL	IB	2019	163	176	191	200	70	9	1	22.5667	58.3333	3	3	3	1	1	1	8.5	181	210	54.3333	50.0285
POL003: 432 J	POL003: 432 J	19I00638	RUBASZEK	POL	IB	2019	163	176	191	200	70	9	1	19.2333	54.3333	3	3	3	1	1	1	9	179.667	208.5	58.5	52.6714
POL003: 433 J	POL003: 433 J	19I00639	RUBINEK	POL	IB	2019	163	176	191	200	70	9	1	20.3667	55.6667	3	3	3	1	1	1	8.5	178.333	207	62.5	66.3674
POL003: 434 J	POL003: 434 J	19I00640	RUFUS	POL	IB	2019	162	173	191	200	70	9	1	22.4333	51.3333	3	3	3	1	1	1	8.66667	179.222	207	53.8333	58.6705
POL003: 388 J	POL003: 388 J	19I00594	AIRWAY	POL	IB	2019	162	173	191	200	65	9	1	23.3333	51.3333	3	3	3	1	1	1	8	181	210	60	67.1096
POL003: 389 J	POL003: 389 J	19I00595	ALLIANZ	POL	IB	2019	162	180	197	204	67	9	1	24.8	56.3333	3	3	3	1	1	1	9	183	210	58.3333	60.3381
POL003: 390 J	POL003: 390 J	19I00596	ARGENTO	POL	IB	2019	162	176	191	200	75	9	1	24.2	54.3333	3	3	3	1	1	1	9	177	207	55	44.6159
POL003: 391 J	POL003: 391 J	19I00597	ATICO	POL	IB	2019	162	179	191	200	65	9	1	20.3333	56.3333	3	3	3	1	1	1	9	182.333	210	64.8333	51.6284
POL003: 392 J	POL003: 392 J	19I00598	BASIC	POL	IB	2019	162	176	191	200	72	9	1	22.1667	58.6667	3	3	3	1	1	1	8	177	207	58	56.0348
POL003: 382 J	POL003: 382 J	500072	BASZA	POL	IB	2019	162	176	191	200	85	9	1	24.0333	53	3	3	3	1	1	1	8	185.667	210	69	89.7433
POL003: 395 J	POL003: 395 J	19I00601	BLASK	POL	IB	2019	163	179	191	200	70	9	1	22.4333	53.3333	3	3	3	1	1	1	8.5	186	210	61.6667	75.0434
POL003: 396 J	POL003: 396 J	19I00602	BORDO	POL	IB	2019	164	178	197	204	85	9	1	23.5667	52.6667	3	3	3	1	1	1	8	179.733	210	65.8667	59.1076
POL003: 397 J	POL003: 397 J	19I00603	BOSS	POL	IB	2019		178	197	204	55	9	1	19.0333	47.3333	3	3	3	1	1	1	8.5	177	207	69	73.6396
POL003: 399 J	POL003: 399 J	19I00605	BRYL	POL	IB	2019	163	173	182	191	70	9	1	22.6667	55.3333	3	3	3	1	1	1	7	175.333	207	61	62.9035
POL003: 260 J	POL003: 260 J	43335	ORLIK	POL	IB	1992----	162	179	191	200	70	9	1	25.3	41	3	3	3	1	1	1	6	185.667	210	63	55.4404
POL003: 265 J	POL003: 265 J	43379	"NAGRAD; NAD 986 "	POL	IB	1992----	162	176	191	200	80	9	1	21.1333	52.3333	3	3	3	1	1	1	9	179.667	210	59.3333	64.2307
POL003: 270 J	POL003: 270 J	43421	LOT	POL	IB	1993----	162	173	191	200	70	9	1	21.4333	55.3333	3	3	3	1	1	1	7	182.333	210	61.3333	0
POL003: 271 J	POL003: 271 J	43424	MOBEK	POL	IB	1993----	162	173	191	200	75	9	1	18.6667	53.6667	3	3	3	1	1	1	7	182.333	210	54.6667	51.9145
POL003: 269 J	POL003: 269 J	43419	NAGRAD	POL	IB	1993----	163	176	191	200	75	9	1	22.0333	47.3333	3	3	3	1	1	1	9	179.667	210	58.3333	65.5726
POL003: 263 J	POL003: 263 J	43368	POLO	POL	IB	1993----	162	173	191	200	55	9		21.1333	33.6667	1	3	3	1	1	1	5	185	207	55.5
POL003: 266 J	POL003: 266 J	43412	RODOS	POL	IB	1993----	162	176	191	200	65	9	1	23.4333	53.3333	3	3	3	1	1	1	9	179.667	207	55.3333	60.7299
POL003: 267 J	POL003: 267 J	43416	DEMA	POL	IB	1993----	179	180	197	204	55	9	1	15.1333	47	3	3	3	1	1	1	9	177	210	70	69.5674
POL003: 369 J	POL003: 369 J	43808	POLDEK	POL	IB	1995----	162	173	191	200	70	9	1	21.0333	54.6667	3	3	3	1	1	1	6	181.333	207	60.3333	61.067
POL003: 336 J	POL003: 336 J	43750	RABEL	POL	IB	1996----	163	173	191	200	70	9	1	23.6	54.6667	3	5	3	1	1	1		177	204	70
POL003: 338 J	POL003: 338 J	43755	RASBET	POL	IB	1996----	163	176	191	200	85	9	1	22.3	51.6667	3	3	3	1	1	1		177	204	76	64.6771
POL003: 334 J	POL003: 334 J	43748	RATAJ	POL	IB	1996----	163	176	191	200	66	9	1	23.4667	56.3333	3	3	3	1	1	1		177	210	71	52.4742
POL003: 337 J	POL003: 337 J	43753	REFREN	POL	IB	1996----	163	176	191	200	70	9	1	23.7333	53	3	5	3	1	1	1		177	204	75	48.8396
POL003: 335 J	POL003: 335 J	43749	RODION	POL	IB	1996----	164	176	191	200	67	9	1	21	59	3	3	3	1	1	1		177	210	64	55.1401
POL003: 303 J	POL003: 303 J	43707	ATOL	POL	IB	1996----	163	173	191	200	70	9	1	20.4	56	3	3	3	1	1	1	9	182.333	210	63	89.2363
POL003: 368 J	POL003: 368 J	43798	GWAREK	POL	IB	1997----	162	173	191	200	80	9	1	23.6667	50.6667	3	3	3	1	1	1	5	186	207	60.3333	62.3036
POL003: 373 J	POL003: 373 J	43867	RASTIK	POL	IB	1999----	160	173	191	200	85	9	1	19.2667	44.6667	3	3	1	1	1	1	9	178	207	59.5
POL003: 374 J	POL003: 374 J	43868	STRATUS	POL	IB	2000----	163	173	191	200	65	9	1	21.5	54.6667	3	3	3	1	1	1	9	182.333	207	57.6667	49.5979
POL003: 377 J	POL003: 377 J	44032	SEZAM	POL	IB	2003----	162	179	191	200	75	9	1	20.3333	49	3	3	3	1	1	1	9	186	210	57.5	107.954
POL003: 376 J	POL003: 376 J	44030	BIES	POL	IB	2003----	162	173	191	200	65	9	1	22.1333	57	3	3	3	1	1	1	6	174.5	207	58.5	100.883
POL003: 378 J	POL003: 378 J	44075	KOS	POL	IB	2005----	162	176	191	200	70	9	1	18.9333	57.3333	3	3	3	1	1	1	6	181	210	59.5	57.0384
POL003: 192 J	POL003: 192 J	41525	E 0004, EX 0008	POL	IC	1977----	162	173	191	200	70	9	1	22.7667	44	3	3	3	1	1	1	4	178.667	207	68	64.4299
POL003: 193 J	POL003: 193 J	41526	E 0047	POL	IC	1977----	162	171	191	200	80	9	1	18.7667	47.3333	3	3	3	1	1	1	7	177	207	78.3333	81.0914
POL003: 194 J	POL003: 194 J	41527	E 0051	POL	IC	1977----	162	171	191	200	80	9	1	24.3	45.6667	3	3	3	1	1	1	8	177	207	82	51.1798
POL003: 195 J	POL003: 195 J	41528	E 0081	POL	IC	1977----	162	171	191	200	83	9	1	24.3	46.6667	3	3	3	1	1	1	4	178	207	77.6667	52.7694
POL003: 196 J	POL003: 196 J	41529	E 0110	POL	IC	1977----	162	171	191	200	85	9	1	19.5	47.6667	3	3	3	1	1	1	6	178	207	74.3333	56.0088
POL003: 197 J	POL003: 197 J	41531	E 0139	POL	IC	1977----	162	179	191	200	80	9	1	25.3	47	3	3	3	1	1	1	6	177	207	78.6667	55.4411
POL003: 198 J	POL003: 198 J	41532	E 0147	POL	IC	1977----	162	176	191	200	80	9	1	23.1333	50.3333	3	3	3	1	1	1	7	179.667	210	78.6667	70.3902
POL003: 199 J	POL003: 199 J	41533	E 0237	POL	IC	1978----	162	176	191	200	80	9	1	23.8333	46.3333	3	3	3	1	1	1		175.333	207	60	68.7878
POL003: 184 J	POL003: 184 J	41430	E 0244	POL	IC	1978----	162	173	191	200	75	9	1	20.3667	48.3333	3	3	3	1	1	1	7	175.333	207	62	46.8526
POL003: 168 J	POL003: 168 J	41282	E 0389	POL	IC	1978----	164	176	191	200	85	9	1	19.7333	49.3333	3	3	3	1	1	1	4	183	210	75.3333	51.769
POL003: 170 J	POL003: 170 J	41284	E 0407,LUBICKI;LUBICKI Ex 0407	POL	IC	1978----	162	173	191	200	85	9	1	21.3667	49	3	3	3	1	1	1	4	178.667	210	72.3333	65.1746
POL003: 186 J	POL003: 186 J	41435	E 0511	POL	IC	1981----	162	179	191	200	85	9	1	15.1667	43	3	3	3	1	1	1	6	179.667	210	76.3333	81.1907
POL003: 185 J	POL003: 185 J	41434	E0 507	POL	IC	1981----	162	176	191	200	80	9	1	22.6667	49.3333	3	3	3	1	1	1	5	179.667	207	75.3333	90.6366
POL003: 219 J	POL003: 219 J	41730	E0040, JARZEC	POL	IC	1977----	162	173	191	200	85	9	1	14.9333	52.6667	3	3	3	1	1	1	4	177	210	58	77.716
POL003: 220 J	POL003: 220 J	41731	E0041, JARZEC	POL	IC	1977----	162	171	191	200	65	9	1	21.7667	45.6667	3	3	3	1	1	1	5	179.667	207	81.3333	73.0241
POL003: 237 J	POL003: 237 J	42120	E0056	POL	IC	1977----	162	179	191	200	75	9	1	22.2667	49	3	3	3	1	1	1	8	177	207	64.6667	63.2099
POL003: 238 J	POL003: 238 J	42121	E0085	POL	IC	1977----	162	171	191	200	83	9	1	22.4333	45	3	3	3	1	1	1	6	182.333	210	71.3333	67.0857
POL003: 95 J	POL003: 95 J	40554	E0188	POL	IC	1977----	162	173	182	191	85	9	1	23	49	3	3	3	1	1	1	8	177	207	66.5	69.2672
POL003: 162 J	POL003: 162 J	41265	E0214	POL	IC	1978----	164	179	191	200	84	9	1	18.6667	41	3	3	3	1	1	1	7	175.333	207	70.3333	56.9398
POL003: 5 J	POL003: 5 J	40004	E0270	POL	IC	1978----	162	176	191	200	84	9	1	22.8667	52.6667	3	3	3	1	1	1	7	177	210	77.5	69.5926
POL003: 11 J	POL003: 11 J	40068	E0301	POL	IC	1978----	162	176	191	200	90	9	1	23.7333	48.3333	3	3	3	1	1	1	7	185.667	210	67	62.6621
POL003: 163 J	POL003: 163 J	41268	E0313	POL	IC	1978----	162	180	197	204	80	9	1	16.5	46	3	3	3	1	1	1	6	183	207	74.3333	57.2417
POL003: 164 J	POL003: 164 J	41269	E0331	POL	IC	1978----	162	176	191	200	85	9	1	19.8	49.6667	3	3	3	1	1	1	6	180.333	207	78
POL003: 165 J	POL003: 165 J	41271	E0339	POL	IC	1978----	162	173	191	200	80	9	1	20.9667	48	3	3	3	1	1	1	5	177	207	71	67.2216
POL003: 166 J	POL003: 166 J	41274	E0359	POL	IC	1978----	163	173	191	200	85	9	1	24.6333	46.6667	3	5	3	1	1	1	6	183	207	67.3333	63.2911
POL003: 167 J	POL003: 167 J	41279	E0363 OP	POL	IC	1978----	162	176	191	200	75	9	1	22.7667	49.3333	3	3	3	1	1	1	8	183	207	62	52.5333
POL003: 12 J	POL003: 12 J	40073	E0386	POL	IC	1978----	162	173	191	200	95	9	1	23.9	49.3333	3	3	3	1	1	1	8	179.667	207	68	50.6102
POL003: 18 J	POL003: 18 J	40215	E0398	POL	IC	1978----	162	176	191	200	95	9	1	16.4667	54.3333	3	3	3	1	1	1	9	177	210	77.5	68.9445
POL003: 221 J	POL003: 221 J	41732	E0400,JARZEC	POL	IC	1978----	162	173	191	200	84	9	1	14.4333	49.3333	3	3	3	1	1	1	5	177	207	70.3333	81.6711
POL003: 180 J	POL003: 180 J	41365	E0429	POL	IC	1979----	162	176	191	200	80	9	1	21.6	50.3333	3	3	3	1	1	1	7	177	207	77	63.8295
POL003: 244 J	POL003: 244 J	42388	E0942	POL	IC	1984----	163	176	191	200	75	9	1	23.5333	55	3	3	3	1	1	1	7	177	204	75.3333	75.7069
POL003: 250 J	POL003: 250 J	43051	E1531	POL	IC	1988----	162	176	191	200	100	9	1	21.4	52.3333	3	3	3	1	1	1	4	179.667	210	73	53.845
POL003: 261 J	POL003: 261 J	43357	E1532	POL	IC	1988----	162	173	191	200	90	9	1	20.3667	51.3333	3	3	3	1	1	1	6	177	207	75	55.5791
POL003: 251 J	POL003: 251 J	43052	E1533,LUBICKI	POL	IC	1988----	162	176	191	200	91	9	1	21.1	50.6667	3	3	3	1	1	1	4	179.667	207	66.3333	70.7695
POL003: 254 J	POL003: 254 J	43055	E1542	POL	IC	1988----	162	176	191	200	95	9	1	20.4333	50.3333	3	3	3	1	1	1	4	177	207	77.3333	69.1775
POL003: 252 J	POL003: 252 J	43053	E1562,LUBICKI	POL	IC	1988----	162	176	191	200	85	9	1	22.4	49	3	3	3	1	1	1	4	179.667	210	81.6667	57.6076
POL003: 253 J	POL003: 253 J	43054	E1564,BROWARNY;E-1563	POL	IC	1988----	162	176	191	200	97	9	1	19.8667	51.3333	3	3	3	1	1	1	4	178	210	76	67.8666
POL003: 61 J	POL003: 61 J	40356	KASTICKY	CSK	IIA	1958----	163	186	197	204	90	9	1	23.7333	50.6667	3	3	3	1	1	1	4	181	210	77	52.927
POL003: 160 J	POL003: 160 J	41231	VALTICKY	CSK	IIA	1958----	162	176	191	200	80	9	1	21.1333	47.3333	3	3	3	1	1	1	8	183	207	72.3333	56.8357
POL003: 55 J	POL003: 55 J	40329	HANACKY STAROVESKY	CSK	IIA	1960----	163	171	191	200	85	9	1	17.1	43.6667	3	3	3	1	1	1	7	177	207	57.5	41.5996
POL003: 206 J	POL003: 206 J	41548	ISARIA	DEU	IIA	1960----	163	171	191	200	90	9	1	22.9333	49	3	3	3	1	1	1	7	185.667	210	79	98.5859
POL003: 217 J	POL003: 217 J	41694	HANNA PROSKOWETZ	CSK	IIA	1961----	162	173	191	200	85	9	1	18.8	53	3	3	3	1	1	1	4	177	210	90
POL003: 202 J	POL003: 202 J	41542	KENIA	DNK	IIA	1961----	162	171	191	200	80	9	1	15.1	50.6667	3	3	3	1	1	1	8	185.667	210	81.3333	107.53
POL003: 203 J	POL003: 203 J	41544	MAJA	DNK	IIA	1961----	162		191	200	85	9	1	19.5667	50	3	3	3	1	1	1	5	175.333	207	70.6667	75.2738
POL003: 200 J	POL003: 200 J	41540	BINDER	DNK	IIA	1961----	162	171	191	200	82	9	1	15.1333	53.6667	3	3	3	1	1	1	9	185	210	71.6667	62.126
POL003: 213 J	POL003: 213 J	41623	DIAMANT	CSK	IIA	1971----	162	173	191	200	87	9	1	19.6	38.3333	3	3	3	1	1	1	9	181	210	67.5
POL003: 208 J	POL003: 208 J	41565	ALSA	DDR	IIA	1971----	162	179	191	200	85	9	1	21	47.6667	3	3	3	1	1	1	6	181		80.5
POL003: 64 J	POL003: 64 J	40384	NOTA	DEU	IIA	1971----	163	179	182	191	105	9	1	22.7667	42.3333	3	3	3	1	1	1	7	183	210	73.6667	64.5605
POL003: 89 J	POL003: 89 J	40468	UNION	DEU	IIA	1971----	160	173	191	200	95	9	1	22.8667	51.3333	3	3	3	1	1	1	6	177	207	63.3333	67.9772
POL003: 90 J	POL003: 90 J	40472	VOLLA	DEU	IIA	1971----	162	173	191	200	90	9	1	23.1333	47.6667	3	3	3	1	1	1	5	177	207	62.3333	47.0943
POL003: 205 J	POL003: 205 J	41546	BIDO	DEU	IIA	1971----	162	171	191	200	85	9	1	22.1333	47	3	3	3	1	1	1	5	185.667	210	62.3333	74.7466
POL003: 201 J	POL003: 201 J	41541	BOMI	DNK	IIA	1971----	162	171	191	200	80	9	1	10.7667	54	3	3	3	1	1	1	9	183	210	73	87.1738
POL003: 25 J	POL003: 25 J	40231	ARIUS CRIEWENER	AUT	IIA	1972----	162	176	191	200	85	9	1	22.4333	50.3333	3	3	3	1	1	1	6	179.667	210	73.6667	62.4134
POL003: 47 J	POL003: 47 J	40309	FERTOEDI EM	HUN	IIA	1972----	162	173	191	200	85	9	1	20.5	48.6667	3	3	3	1	1	1	3	183	207	68	58.8767
POL003: 37 J	POL003: 37 J	40272	D 802 TAWASZI	HUN	IIA	1972----	163	176	191	200	83	9	1	13.0667	46	3	3	3	1	1	1	6	177	207	73.6667	60.542
POL003: 145 J	POL003: 145 J	40901	FAVORIT	CSK	IIA	1972----	162	173	191	200	85	9	1	21.4667	45.3333	3	3	3	1	1	1	6	179.667	207	80.6667	65.0629
POL003: 79 J	POL003: 79 J	40439	SLOVENSKY DUNAJSKY	CSK	IIA	1972----	164	176	191	200	92	9	1	18.4667	47.3333	3	3	3	1	1	1	5	179.667	207	80.3333	56.4946
POL003: 85 J	POL003: 85 J	40459	TEPELSKY HORSKY	CSK	IIA	1972----	158	176	191	200	105	9	1	18.9333	45	3	3	3	1	1	1	5	175.333	207	89.6667	59.9089
POL003: 157 J	POL003: 157 J	41102	TOPAS	CSK	IIA	1972----	164	176	191	200	80	9	1	11.1	45	3	3	3	1	1	1	8	180.333	207	70.3333	75.1948
POL003: 88 J	POL003: 88 J	40464	TRIUMPF CZESKI	CSK	IIA	1972----	162	173	191	200	105	9	1	21.6333	48.3333	3	3	3	1	1	1	8	183	210	75.3333	72.4396
POL003: 22 J	POL003: 22 J	40226	ALTANSKY NAVENI	CSK	IIA	1972----	159	173	191	200	95	9	5	36.4	43.6667	3	3	3	1	1	1	4	181.333	207	58.3333	46.2133
POL003: 146 J	POL003: 146 J	40903	AMETYST	CSK	IIA	1972----	163	173	191	200	80	9	1	19.0333	49.6667	3	3	3	1	1	1	6	179.667	207	77.3333	59.4275
POL003: 31 J	POL003: 31 J	40259	BUCIANSKY	CSK	IIA	1972----	161	176	191	200	70	9	1	19	50	3	3	3	1	1	1	6	177	207	69.3333	59.2431
POL003: 40 J	POL003: 40 J	40298	DOBROVICKY STAROCESKY	CSK	IIA	1972----	162	173	191	200	85	9	1	20.9	43.3333	3	3	3	1	1	1	7	180.333	207	64	53.774
POL003: 41 J	POL003: 41 J	40300	DREGERUV IMPERIAL	CSK	IIA	1972----	162	171	191	200	85	9	1	13.8667	48.6667	3	3	3	1	1	1	5	183	210	75	75.4363
POL003: 43 J	POL003: 43 J	40302	DUKAT	CSK	IIA	1972----	164	176	191	200	70	9	1	17.8667	52.6667	3	3	3	1	1	1	9	180.333	207	77.3333
POL003: 44 J	POL003: 44 J	40303	DUNAJSKY	CSK	IIA	1972----	162	176	191	200	85	9	1	10.6333	53.3333	3	3	3	1	1	1	8	180.333	210	81.3333	77.4082
POL003: 45 J	POL003: 45 J	40305	DVORKEGO HANACKY	CSK	IIA	1972----	162	173	191	200	85	9	1	22.6333	49.6667	3	3	3	1	1	1	6	177	207	78.6667	74.2629
POL003: 141 J	POL003: 141 J	40838	GALINA	DDR	IIA	1972----	161	173	191	200	65	9	1	23.8333	46.3333	3	3	3	1	1	1	6	173.667	207	65.3333	47.1744
POL003: 50 J	POL003: 50 J	40314	FIRLBECKS	DEU	IIA	1972----	162	173	191	200	85	9	1	21.3333	47.6667	3	3	3	1	1	1	4	180.333	207	61.6667	78.9751
POL003: 78 J	POL003: 78 J	40438	GRAUSKEITZ SIEGESGERSTE	DEU	IIA	1972----	162	176	191	200	95	9	1	21.0667	51	3	3	3	1	1	1	5	177	207	82	65.4766
POL003: 147 J	POL003: 147 J	40907	HAISA	DEU	IIA	1972----	162	173	191	200	80	9	1	23.9333	46.3333	3	3	3	1	1	1	5	179.667	207	74.3333	66.4353
POL003: 60 J	POL003: 60 J	40351	IRMA	DEU	IIA	1972----	177	186	197	204	65	9	1	17.4	43	3	3	3	1	1	1	5	177	207	75.5	53.1942
POL003: 152 J	POL003: 152 J	40984	MATURA	DEU	IIA	1972----	162	176	191	200	80	9	1	10.5333	49.3333	3	3	3	1	1	1	5	186	210	69.3333	64.4214
POL003: 148 J	POL003: 148 J	40908	ORIOL	DEU	IIA	1972----	163	176	191	200	85	9	1	19.5667	51	3	3	3	1	1	1	6.6	177	207	77	55.015
POL003: 155 J	POL003: 155 J	41030	ORTOLAN	DEU	IIA	1972----	161	173	191	200	75	9	1	17.2	45.3333	3	3	3	1	1	1	8	177	207	79.3333	60.7972
POL003: 76 J	POL003: 76 J	40429	SAXONIA	DEU	IIA	1972----	163	171	182	191	90	9	1	21.5	44.6667	3	3	3	1	1	1	8	179.667	210	80.3333	71.8786
POL003: 77 J	POL003: 77 J	40437	SIEGESGERSTE	DEU	IIA	1972----	160	171	182	191	100	9	5	42.4333	35.6667	3	3	3	1	1	1	7	177	207	78	54.5581
POL003: 149 J	POL003: 149 J	40911	SILESIA	DEU	IIA	1972----	164	176	191	200	85	9	1	12.3333	47	3	3	3	1	1	1	5	177	207	84	44.9774
POL003: 80 J	POL003: 80 J	40448	STEPHAN	DEU	IIA	1972----	164	173	191	200	95	9	1	22.2333	46.3333	3	3	3	1	1	1	5	180.333	207	78.6667	59.5801
POL003: 82 J	POL003: 82 J	40450	Strengs Franken	DEU	IIA	1972----	160	176	191	200	95	9	1	22.2	51.6667	3	3	3	1	1	1	7	180.333	210	71.3333	64.6807
POL003: 83 J	POL003: 83 J	40451	STRENGS H 29/3	DEU	IIA	1972----	160	176	191	200	95	9	1	22.5333	49.6667	3	3	3	1	1	1	5	177	210	74.3333	60.8644
POL003: 87 J	POL003: 87 J	40463	TRUMPF	DEU	IIA	1972----	162	173	191	200	100	9	1	18.4667	51	3	3	3	1	1	1	8	185	210	83.3333	70.3656
POL003: 23 J	POL003: 23 J	40229	AMRIGSCHWANDER	DEU	IIA	1972----	161	186	197	204	80	9	1	20.3333	49	3	3	3	1	1	1	6	177	207	63.3333	60.6506
POL003: 135 J	POL003: 135 J	40645	ASPA	DEU	IIA	1972----	164	179	191	200	85	9	1	20.6667	52.3333	3	3	3	1	1	1	8	177	207	73.5
POL003: 134 J	POL003: 134 J	40633	DANUBIA	DEU	IIA	1972----	162	179	191	200	85	9	1	20.5667	45	3	3	3	1	1	1	6	181	207	81.5	62.8238
POL003: 20 J	POL003: 20 J	40222	OPAL	DNK	IIA	1972----	163	176	191	200	95	9	1	11.6333	55.3333	3	3	3	1	1	1	4	181	207	70	60.2052
POL003: 21 J	POL003: 21 J	40223	REX	DNK	IIA	1972----	161	176	191	200	95	9	1	23.4333	50.6667	3	3	3	1	1	1	6	182.333	207	65	64.9256
POL003: 73 J	POL003: 73 J	40422	RIGEL	DNK	IIA	1972----	163	171	191	200	83	9	1	22.2333	50	3	3	3	1	1	1	8	179.667	210	78.6667	49.9728
POL003: 19 J	POL003: 19 J	40221	ARCHER	DNK	IIA	1972----	162	176	191	200	95	9	1	21.8333	56.3333	3	3	3	1	1	1	6	186	210	80	78.0218
POL003: 38 J	POL003: 38 J	40273	DAENISCH	DNK	IIA	1972----	162	179	191	200	90	9	1	18.1333	51.3333	3	3	3	1	1	1	6	182.333	210	71.6667	64.2155
POL003: 133 J	POL003: 133 J	40625	DEBA	DNK	IIA	1972----	162	176	191	200	70	9	5	38.7667	49.3333	3	3	3	1	1	1	9	181.333	207	40	33.5816
POL003: 139 J	POL003: 139 J	40799	DENSO	DNK	IIA	1972----		179	191	200	70	9	1	17.1	47.3333	3	3	3	1	1	1	8	181	207	67.5	82.6351
POL003: 26 J	POL003: 26 J	40232	ASSE	DEU	IIA	1973----	162	186	197	204	85	9	5	44.5333	50.3333	3	3	3	1	1	1	5	177	210	60.6667	85.0238
POL003: 136 J	POL003: 136 J	40787	CONTRA	DEU	IIA	1973----	162	176	191	200	80	9	1	20.1667	50	3	3	3	1	1	1	9	182	210	76.5	64.439
POL003: 6 J	POL003: 6 J	40020	BONA	DEU	IIA	1974----	162	176	191	200	75	9	1	24.4667	48.6667	3	3	3	1	1	1	6	182	210	62	54.4592
POL003: 159 J	POL003: 159 J	41176	MARTHA	AUT	IIA	1975----	164	179	191	200	80	9	1	18.7333	46	3	3	3	1	1	1	9	179.667	210	84.6667	44.9906
POL003: 204 J	POL003: 204 J	41545	MALA	DNK	IIA	1977----	164	171	191	200	73	9	1	22.2333	48.3333	3	3	3	1	1	1	6	185.667	210	70.3333	85.431
POL003: 118 J	POL003: 118 J	40594	EMMA	AUT	IIA	1978----	164	176	191	201	80	9	1	20.6	51	3	3	3	1	1	1	6	185.667	210	62	59.1862
POL003: 131 J	POL003: 131 J	40618	IDOLA	AUT	IIA	1978----	162	176	191	200	70	9	1	18.4333	52.3333	3	3	3	1	1	1	9	179.667	207	69	60.1698
POL003: 116 J	POL003: 116 J	40592	PLENUM	AUT	IIA	1978----	162	176	191	201	85	9	1	22.4	57	3	3	3	1	1	1	9	177	207	60	58.9267
POL003: 132 J	POL003: 132 J	40619	UTA	AUT	IIA	1978----	164	176	197	215	75	9	1	13.8667	52	3	5	3	1	1	1	8	185.667	207	67.3333	44.2039
POL003: 130 J	POL003: 130 J	40617	ADORA	AUT	IIA	1978----	179	186	197	204	70	9	1	19.6	46.3333	3	3	3	1	1	1	9	179.667	207	75	61.9051
POL003: 129 J	POL003: 129 J	40616	SPARTAN	CSK	IIA	1978----	162	176	191	200	80	9	1	23.4	50.3333	3	3	3	1	1	1	9	182.333	210	64	66.4123
POL003: 101 J	POL003: 101 J	40566	GERDA	DEU	IIA	1978----	164	176	191	201	80	9	1	30.4333	42.3333	3	3	1	1	1	3	8	183	207	60.6667	61.9139
POL003: 98 J	POL003: 98 J	40563	LAUDA	DEU	IIA	1978----	162	176	191	200	80	9	1	22.3	51.6667	3	3	3	1	1	1	7	181	210	73.5	60.0184
POL003: 102 J	POL003: 102 J	40567	ASPANA	DEU	IIA	1978----	162	176	191	201	80	9	1	21.8667	50.6667	3	3	3	1	1	1	8	183	207	69.6667	63.9838
POL003: 99 J	POL003: 99 J	40564	BREVIA	DEU	IIA	1978----	162	176	182	191	75	9	1	25.3333	47	3	3	3	1	1	1	7	181	210	63.5	57.8657
POL003: 100 J	POL003: 100 J	40565	CAMILA	DEU	IIA	1978----	164	176	191	201	70	9	1	27.4667	48	3	3	3	1	1	1	9	185	210	58.6667	63.6603
POL003: 97 J	POL003: 97 J	40562	CLAUDIA	DEU	IIA	1978----	163	176	191	200	70	9	1	25.7667	48.6667	3	3	3	1	1	1	9	186	210	62.5	63.9507
POL003: 128 J	POL003: 128 J	40604	DEISTER	DEU	IIA	1978----	162	173	191	200	80	9	1	19.8	53.6667	3	3	3	1	1	1	8	183	210	66	52.334
POL003: 106 J	POL003: 106 J	40575	LILA	DNK	IIA	1978----	162	173	191	200	70	9	1	17.0667	53	3	3	3	1	1	1	9	177	207	63.6667	49.5631
POL003: 107 J	POL003: 107 J	40576	MIRJAM	DNK	IIA	1978----	163	173	191	200	70	9	1	21.1	54.3333	3	3	3	1	1	1	9	179.667	207	61	58.572
POL003: 108 J	POL003: 108 J	40577	NERY	DNK	IIA	1978----	162	173	191	200	70	9	1	14.9667	58.3333	3	3	3	1	1	1	9	185.667	207	60.6667	57.0352
POL003: 105 J	POL003: 105 J	40574	VEGA	DNK	IIA	1978----	164	179	191	200	70	9	1	24.1333	51	3	3	3	1	1	1	8	180.333	210	68.6667	52.9171
POL003: 178 J	POL003: 178 J	41355	KARAT	CSK	IIA	1979----	163	176	191	200	75	9	1	21.6333	52.3333	3	3	3	1	1	1	9	186	210	65.5	54.7389
POL003: 36 J	POL003: 36 J	40271	KORAL	CSK	IIA	1979----		176	191	200	67	9	1	19	46.3333	3	3	3	1	1	1	8	186	207	60	57.9741
POL003: 176 J	POL003: 176 J	41352	KRYSTAL	CSK	IIA	1979----	164	176	191	200	70	9	1	17	49	3	3	3	1	1	1	7	186	210	62	53.9969
POL003: 81 J	POL003: 81 J	40449	RUBIN	CSK	IIA	1979----	164	176	191	200	80	9	1	22.8667	44.3333	3	3	3	1	1	1	9	185	210	63.6667	57.1378
POL003: 177 J	POL003: 177 J	41353	SAFIR	CSK	IIA	1979----	162	179	191	200	75	9	1	18.3333	40.6667	3	3	3	1	1	1	8	181	207	68	55.1674
POL003: 175 J	POL003: 175 J	41351	ZEFIR	CSK	IIA	1979----	162	176	191	200	80	9	1	22.4333	48	3	3	3	1	1	1	9	181	210	63	48.0393
POL003: 179 J	POL003: 179 J	41356	BR 638	CSK	IIA	1979----	161	173	191	200	70	9	1	20.6333	49.3333	3	3	3	1	1	1	8	174.5	207	50	43.9654
POL003: 258 J	POL003: 258 J	43259	BEATE	DEU	IIA	1987----	162	176	191	200	80	9	1	22.4667	54.3333	3	3	3	1	1	1	6	177	210	66.5	49.9385
POL003: 256 J	POL003: 256 J	43057	ALEXIS	DEU	IIA	1988----	162	179	191	200	80	9	1	24.4	57	3	3	3	1	1	1	6	187	210	70	67.0939
POL003: 49 J	POL003: 49 J	40312	EVROPEUM	SUN	IIA	1972----	162	173	191	200	90	9	1	20.6	46	3	3	3	1	1	1	3	185	207	73.6667	63.4562
POL003: 59 J	POL003: 59 J	40350	IRKUCKI	SUN	IIA	1972----	158	171	191	200	85	9	5	48.6667	34.3333	3	3	3	1	1	1	6	174.5	207	79	68.1142
POL003: 75 J	POL003: 75 J	40424	RIZSKIJ	SUN	IIA	1972----	160	171	182	191	105	9	1	21.3	55.3333	3	3	3	1	1	1	8	177	207	78.6667	54.16
POL003: 94 J	POL003: 94 J	40532	CZERNOMOREC	SUN	IIA	1978----	157	173	182	191	85	9	1	20.9333	52.6667	3	3	3	1	1	1	5	174.5	207	63	52.7741
POL003: 375 J	POL003: 375 J	43966	FORUM	CSK	IIB	2001----	164	176	191	200	65	9	1	24.5	51	3	5	3	1	1	1	9	185	207	50	50.7492
POL003: 381 J	POL003: 381 J	500071	ANTEK	AUT	IIB	2019	162	176	191	200	75	9	1	24.8	54	3	3	3	1	1	1	9	175.333	207	59.3333	107.578
POL003: 401 J	POL003: 401 J	19I00607	ESMA	DEU	IIB	2019	162	176	191	200	75	9	1	20.2667	53.3333	3	3	3	1	1	1	8	179.667	207	54	46.5451
POL003: 402 J	POL003: 402 J	19I00608	FARIBA	DEU	IIB	2019	162	181	197	204	65	9	1	22.1	52.6667	3	3	3	1	1	1	9	182.333	207	57	46.5464
POL003: 407 J	POL003: 407 J	19I00613	KWS ATRIKA	DEU	IIB	2019	162	176	200	209	90	9	1	24.4667	53.6667	3	3	3	1	1	1	8	179.667	208.5	57.8333	77.9121
POL003: 408 J	POL003: 408 J	19I00614	KWS CANTTON	DEU	IIB	2019		180	197	204	65	9	1	10.95	50	3	3	3	1	1	1	6	182.111	208.5	66.6389	75.7346
POL003: 409 J	POL003: 409 J	19I00615	KWS DANTE	DEU	IIB	2019	163	176	191	200	65	9	1	24.1667	50.3333	3	3	3	1	1	1	9	180	208.5	56.5	84.1709
POL003: 410 J	POL003: 410 J	19I00616	KWS FABIENNE	DEU	IIB	2019	162	186	197	204	75	9	1	19.9667	53.3333	3	3	3	1	1	1	9	180	210	57.5	91.1949
POL003: 411 J	POL003: 411 J	19I00617	KWS HARRIS	DEU	IIB	2019	163	187	198	205	80	9	1	22.1	54.3333	3	3	3	1	1	1	7	179.667	207	69.7222	138.408
POL003: 412 J	POL003: 412 J	19I00618	KWS IRINA	DEU	IIB	2019	162	176	191	200	75	9	1	25.2	52.6667	3	3	3	1	1	1	8	182.175	209.5	58.2222	68.9096
POL003: 413 J	POL003: 413 J	19I00619	KWS OLOF	DEU	IIB	2019	163	176	191	200	75	9	1	21.0667	50	3	3	3	1	1	1	9	179.667	207	63.6667	67.3079
POL003: 414 J	POL003: 414 J	19I00620	KWS ORPHELIA	DEU	IIB	2019	163	176	191	200	80	9	1	26.9667	48.6667	3	3	3	1	1	1	9	182.333	210	57	49.3024
POL003: 415 J	POL003: 415 J	19I00621	KWS VERMONT	DEU	IIB	2019	162	179	197	204	75	9	1	24.3333	50.6667	3	3	3	1	1	1	9	185.667	210	49.6667	99.6517
POL003: 416 J	POL003: 416 J	19I00622	MARTHE	DEU	IIB	2019	163	176	191	200	75	9	1	19.4333	51	3	3	3	1	1	1	6	177	207	62.5	76.189
POL003: 419 J	POL003: 419 J	19I00625	NOKIA	DEU	IIB	2019	164	173	191	200	50	9	1	19.2667	42	3	3	3	1	1	1		177	204	68.75	100.034
POL003: 435 J	POL003: 435 J	19I00641	SALOME	DEU	IIB	2019	162	176	191	200	70	9	1	21.3333	53	3	3	3	1	1	1	6.33333	179.444	208.5	59.9444	58.6995
POL003: 437 J	POL003: 437 J	19I00643	SOLDO	DEU	IIB	2019	164	179	191	200	70	9	1	24.5	53.6667	3	3	3	1	1	1	8	185.667	210	61.7778	93.1884
POL003: 438 J	POL003: 438 J	19I00644	SU LOLEK	DEU	IIB	2019	163	176	191	200	65	9	1	21.6333	51.6667	3	3	3	1	1	1	9	183.222	208.5	61.4722	77.1167
POL003: 379 J	POL003: 379 J	500068	TOCADA	DEU	IIB	2019	164	179	191	200	70	9	1	24.1333	55.6667	3	3	3	1	1	1	5	180.333	210	60.3333	97.7029
POL003: 384 J	POL003: 384 J	500078	WIDAWA	DEU	IIB	2019	162	179	191	200	70	9	1	21.2333	53	3	5	3	1	1	1	8	183	210	58.6667	61.1989
POL003: 387 J	POL003: 387 J	19I00593	ACCORDINE	DEU	IIB	2019	162	171	191	200	75	9	1	23.9333	55	3	3	3	1	1	1	9	181.222	209	62.5556	53.4089
POL003: 393 J	POL003: 393 J	19I00599	BEATRIX	DEU	IIB	2019	163	176	191	200	70	9	1	22.8333	47.3333	3	3	3	1	1	1	8	179.667	207	61.6667	58.1074
POL003: 398 J	POL003: 398 J	19I00604	BRITNEY	DEU	IIB	2019	163	176	191	200	65	9	1	21.0667	54	3	3	3	1	1	1	9	184	207	53	48.4863
POL003: 405 J	POL003: 405 J	19I00611	JUSTINA	DNK	IIB	2019	162	176	191	200	75	9	1	24.8333	57.3333	3	3	3	1	1	1	8	184.778	209	66.6667	57.0952
POL003: 383 J	POL003: 383 J	500076	SEBASTIAN	DNK	IIB	2019	162	176	191	200	60	9	1	22.8	52	3	3	3	1	1	1	9	182.333	210	55.3333	53.3691
POL003: 273 J	POL003: 273 J	43500	GRIT	DEU	IIB	1993----	163	176	191	200	75	9	1	20.5	47.6667	3	3	3	1	1	1	9	183	210	62	69.779
POL003: 274 J	POL003: 274 J	43596	KRONA	DEU	IIB	1993----	163	176	190	199	80	9	1	23.3667	50.6667	3	3	3	1	1	1	8	177	210	67	68.0703
POL003: 281 J	POL003: 281 J	43685	ELISA	AUT	IIB	1995----	162	173	182	191	75	9	1	21.8333	59	3	3	3	1	1	1	8	179.667	207	58.6667
POL003: 275 J	POL003: 275 J	43672	MARESI	DEU	IIB	1995----	163	176	191	200	70	9	1	21.5	55.3333	3	3	3	1	1	1	6	177	210	57	56.0188
POL003: 356 J	POL003: 356 J	43778	VIVA	AUT	IIB	1996----	162	173	191	200	70	9	1	23.2667	52	3	3	3	1	1	1	6	178.667	207	52.3333	52.3613
POL003: 326 J	POL003: 326 J	43737	HERAN	CSK	IIB	1996----	157	173	182	200	50	9	1	18.9667	53.6667	3	3	3	1	1	1	9	173.667	207	47.5	64.1017
POL003: 327 J	POL003: 327 J	43738	JASPIS	CSK	IIB	1996----	163	176	191	200	70	9	1	20.5333	53.3333	3	3	3	1	1	1	6	181		65.5	59.965
POL003: 313 J	POL003: 313 J	43723	LADIK	CSK	IIB	1996----	162	176	191	200	60	9	1	20.8	50.6667	3	3	3	1	1	1	8	173.667	207	62
POL003: 314 J	POL003: 314 J	43724	LUMAR	CSK	IIB	1996----	162	176	191	200	55	9	1	19.7	49.6667	3	3	3	1	1	1	8	175.333	207	64.3333	95.5343
POL003: 328 J	POL003: 328 J	43740	PERUN	CSK	IIB	1996----	162	173	191	200	77	9	1	24.0667	51.3333	3	3	3	1	1	1		174.5	178.5	59.5	52.8418
POL003: 329 J	POL003: 329 J	43741	PRIMUS	CSK	IIB	1996----	162	179	191	200	74	9	1	21.3333	51.6667	3	3	3	1	1	1		181	183.75	60.5	56.7137
POL003: 325 J	POL003: 325 J	43736	PROFIT	CSK	IIB	1996----	162	176	191	200	65	9	1	22.4	52	3	3	3	1	1	1	9	177	207	60.3333	61.1692
POL003: 312 J	POL003: 312 J	43722	VIKTOR	CSK	IIB	1996----		176	191	200	55	9	1	14.6	57.3333	3	3	3	1	1	1	9	185.667	210	52
POL003: 332 J	POL003: 332 J	43745	HALLA	DEU	IIB	1996----	163	176	191	200	70	9	1	22.3667	49.6667	3	3	3	1	1	1		172	178.5	70	108.607
POL003: 310 J	POL003: 310 J	43719	HENNI	DEU	IIB	1996----	164	179	191	200	70	9	1	24.1	52.3333	3	3	3	1	1	1	8	182.333	210	61	63.9869
POL003: 297 J	POL003: 297 J	43701	POLYGENA	DEU	IIB	1996----	164	180	197	204	80	9	1	23.4333	51.6667	3	3	3	1	1	1	9	186	210	67.5	71.7386
POL003: 308 J	POL003: 308 J	43713	SCARLETT	DEU	IIB	1996----	164	176	191	200	70	9	1	25.3	48.6667	3	3	3	1	1	1	8	183	207	67	100.102
POL003: 311 J	POL003: 311 J	43721	THURINGIA	DEU	IIB	1996----	162	176	191	200	70	9	1	21	48	3	3	3	1	1	1	8	173.667	207	68	54.3394
POL003: 306 J	POL003: 306 J	43711	EVELYN	DNK	IIB	1996----	162	173	191	200	80	9	1	17.9	57	3	3	3	1	1	1	7	177	210	70
POL003: 284 J	POL003: 284 J	43688	GIVE ABED	DNK	IIB	1996----	163	179	191	200	65	9	1	20.9333	53	3	5	3	1	1	1	9	185.667	210	65.6667	119.825
POL003: 330 J	POL003: 330 J	43743	LISBET	DNK	IIB	1996----	164	179	191	200	70	9	1	18.0333	51.6667	3	3	3	1	1	1		185		66	110.683
POL003: 331 J	POL003: 331 J	43744	ANNASOFIE	DNK	IIB	1996----	177	186	197	204	50	9	1			3	3	3	1	1	1		185	210	60.5	132.174
POL003: 307 J	POL003: 307 J	43712	BARKE	DNK	IIB	1996----	164	179	191	200	85	9	1	23.7333	48.6667	3	3	3	1	1	1	5	185.667	210	69.6667
POL003: 317 J	POL003: 317 J	43727	CAMINANT	DNK	IIB	1996----	164	180	197	204	55	9	1	16.9333	53.3333	3	3	3	1	1	1	8	185.667	210	62	64.1292
POL003: 316 J	POL003: 316 J	43726	CANUT	DNK	IIB	1996----	164	180	197	204	55	9	1	19.2667	52.3333	3	3	3	1	1	1	8	185.667	204	63	64.7691
POL003: 360 J	POL003: 360 J	43782	HELLANA	AUT	IIB	1997----	162	173	191	200	92	9	1	22.2667	49.6667	3	3	3	1	1	1	9	185.667	207	59.3333	52.714
POL003: 370 J	POL003: 370 J	43840	PROSA	AUT	IIB	1999----	163	176	191	200	70	9	1	20.1333	54	3	3	3	1	1	1	7	185.667	210	55	52.6399
POL003: 372 J	POL003: 372 J	43848	ORTHEGA	DEU	IIB	1999----	163	176	191	200	65	9	1	23.1333	51.3333	3	3	3	1	1	1	9	179.667	207	57.3333	64.0233
POL003: 371 J	POL003: 371 J	43843	BRENDA	DEU	IIB	1999----	162	176	191	200	80	9	1	23.6333	49	3	3	3	1	1	1	9	183	210	65.6667	78.7609
POL003: 249 J	POL003: 249 J	43041	PAMINA	UKR	IIB	1991----	164	176	191	200	75	9	1	18.7333	49.3333	3	3	3	1	1	1	5	185.667	207	65	66.5599
POL003: 277 J	POL003: 277 J	43676	KASHTAN	SUN	IIB	1995----	162	176	182	191	87	9	1	19.5667	59.6667	3	3	3	1	1	1	6	180.333	207	70	66.8943
POL003: 278 J	POL003: 278 J	43678	ODESKYI 131	SUN	IIB	1995----	162	176	191	200	90	9	1	24.3333	59.3333	3	3	3	1	1	1	6	179.667	210	74	63.088
POL003: 279 J	POL003: 279 J	43679	PALLIDUM 107	SUN	IIB	1995----	158	176	191	200	75	9	5	43.5	49.6667	3	3	3	2	1	1	5	177	207	62.3333	48.9104
POL003: 280 J	POL003: 280 J	43680	SPOMIN	SUN	IIB	1995----	162	173	182	191	85	9	1	24.3	48	3	5	3	1	1	1	9	179.667	207	55.3333	56.1314
POL003: 137 J	POL003: 137 J	40797	DAUPHINE	BEL	IIIA	1972----	163	180	197	204	60	9	1	21.4	41	3	3	3	1	1	1	8	181	210	78	49.2019
POL003: 48 J	POL003: 48 J	40311	ETOILE DU VELAY	FRA	IIIA	1972----	162	173	191	200	85	9	1	17.8667	43.3333	3	3	3	1	1	1	8	179.667	207	71.3333	69.6605
POL003: 51 J	POL003: 51 J	40318	GLOIRE DU VELAY	FRA	IIIA	1972----	163	176	191	200	85	9	1	21.2	53.3333	3	3	3	1	1	1	5	185.667	207	75.6667	58.9379
POL003: 70 J	POL003: 70 J	40408	PLATEN	FRA	IIIA	1972----	162	173	182	191	97	9	1	26.8333	46.6667	3	3	3	1	1	1	6	177	207	77.3333	61.2512
POL003: 74 J	POL003: 74 J	40423	RIVALE	FRA	IIIA	1972----	163	171	191	200	90	9	1	21.4333	42	3	3	3	1	1	1	8	177	207	83.6667	72.3352
POL003: 39 J	POL003: 39 J	40274	COLMAR	FRA	IIIA	1973----	162	173	191	200	85	9	1	21.4667	44.6667	3	3	3	1	1	1	8	183	210	65	46.6692
POL003: 10 J	POL003: 10 J	40058	HEBE	FRA	IIIA	1974----	162	176	191	200	90	9	1	22.4333	50.3333	3	3	3	1	1	1	8	185.667	207	71.3333	69.8605
POL003: 13 J	POL003: 13 J	40142	LORA	FRA	IIIA	1974----	162	179	191	200	84	9	1	21.0667	48.3333	3	3	3	1	1	1	8	179.667	210	67.3333	61.4366
POL003: 15 J	POL003: 15 J	40182	PALOMA	FRA	IIIA	1974----	164	180	197	204	73	9	1	16.8667	48.6667	3	3	3	1	1	1	8	181	210	58.5	71.3762
POL003: 16 J	POL003: 16 J	40183	PERORGE	FRA	IIIA	1974----	163	179	191	200	85	9	1	23.4	50.3333	3	3	3	1	1	1	8	177	210	66.5	53.8824
POL003: 9 J	POL003: 9 J	40037	DEA	FRA	IIIA	1974----	162	179	191	200	85	9	1	21.5667	51.3333										65	58.8022
POL003: 103 J	POL003: 103 J	40568	AUREA	FRA	IIIA	1978----	161	179	191	200	75	9	1	22.9667	53.3333	3	3	3	1	1	1	8	185.667	210	68.3333	64.7234
POL003: 120 J	POL003: 120 J	40596	BEKA	FRA	IIIA	1978----	162	176	191	200	90	9	1	21.7333	47.3333	3	3	3	1	1	1	5	177	207	77.3333	60.5647
POL003: 104 J	POL003: 104 J	40569	CHARMA	FRA	IIIA	1978----	162	176	191	200	75	9	1	27.6	50	3	5	3	1	1	1	7	177	207	63.6667	49.6113
POL003: 119 J	POL003: 119 J	40595	COPELIA	FRA	IIIA	1978----	164	176	191	200	95	9	1	23.1333	52.6667	3	3	3	1	1	1	8	182.333	207	57.3333	50.6342
POL003: 421 J	POL003: 421 J	19I00627	Olympic	FRA	IIIB	2019	163	179	191	200	75	9	1	22.8	53.3333	3	3	3	1	1	1	7	180.333	210	56.3333	48.5668
POL003: 422 J	POL003: 422 J	19I00628	OVATION	FRA	IIIB	2019	162	176	191	200	70	9	1	23.2	52.3333	3	3	3	1	1	1	8	184.333	210	60.1667	58.6875
POL003: 427 J	POL003: 427 J	19I00633	PRESTIGE	FRA	IIIB	2019	162	176	191	200	70	9	1	24.3333	52.3333	3	3	3	1	1	1	8.66667	177.5	210	67.0556
POL003: 430 J	POL003: 430 J	19I00636	RGT PLANET	FRA	IIIB	2019	163	176	197	204	75	9	1	23.9667	55.3333	3	3	3	1	1	1	8.5	178.333	208.5	64.5	67.1281
POL003: 436 J	POL003: 436 J	19I00642	SIGNORA	FRA	IIIB	2019	162	176	191	200	75	9	1	25.2667	54.3333	3	3	3	1	1	1	9	178.333	210	65.6667	71.3319
POL003: 380 J	POL003: 380 J	500069	ŻEGLARZ	FRA	IIIB	2019	162	179	191	200	75	9	1	24.4	54.3333	3	3	3	1	1	1	6	177	210	65.6667	108.925
POL003: 354 J	POL003: 354 J	43776	MICHKA	FRA	IIIB	1996----	164	176	191	200	65	9	1	21.9333	41.3333	3	3	3	1	1	1	9	185.667	210	57	58.9056
POL003: 296 J	POL003: 296 J	43700	ORCIVALE	FRA	IIIB	1996----	163	180	197	204	75	9	1	22.1	43.3333	3	3	3	1	1	1	9	186		58	97.3396
POL003: 340 J	POL003: 340 J	43759	TEXANE	FRA	IIIB	1996----	164	179	197	204	60	9	1	21	54.3333	3	3	3	1	1	1	7	183	207	60.3333	54.8017
POL003: 355 J	POL003: 355 J	43777	TREMOIS	FRA	IIIB	1996----	164	176	191	200	65	9	1	22.4667	45.6667	3	3	3	1	1	1	9	179.667	207	54.6667
POL003: 341 J	POL003: 341 J	43760	TRIANON	FRA	IIIB	1996----	164	180	197	204	70	9	1	23.2667	49.3333	3	3	3	1	1	1	8	182.333	210	65	100.064
POL003: 309 J	POL003: 309 J	43718	VAHINE	FRA	IIIB	1996----	164	176	191	200	65	9	1	22.6333	53.6667	3	3	3	1	1	1	8	177	210	71	61.6768
POL003: 352 J	POL003: 352 J	43774	BEATRICE	FRA	IIIB	1996----	164	179	191	200	95	9	1	21.1333	38.3333	3	3	3	1	1	1	9	186	210	71.3333	55.3102
POL003: 304 J	POL003: 304 J	43708	BELLISSIMA	FRA	IIIB	1996----	164	178	197	204	75	9	1	21.6	49.3333	3	3	3	1	1	1	9	185.667	210	70	74.6318
POL003: 353 J	POL003: 353 J	43775	CERES	FRA	IIIB	1996----	162	176	191	200	70	9	1	19.6667	50.3333	3	3	3	1	1	1	7.6	179.667	207	65.3333	54.5535
POL003: 292 J	POL003: 292 J	43696	CHAPKA	FRA	IIIB	1996----	169	179	191	200	75	9	1	24.1	44	3	3	3	1	1	1	8	186	210	67.3333	77.6136
POL003: 291 J	POL003: 291 J	43695	DOUCHKA	FRA	IIIB	1996----	163	176	191	200	80	9	1	24.0333	47.3333	3	3	3	1	1	1	9	183	210	65	106.053
POL003: 363 J	POL003: 363 J	43790	FLIKA	FRA	IIIB	1997----	162	176	191	200	80	9	1	21.6333	56	3	3	3	1	1	1	9	177	210	64	49.5688
POL003: 362 J	POL003: 362 J	43789	JERKA	FRA	IIIB	1997----	164	176	191	200	75	9	1	22.9333	56.3333	3	5	3	1	1	1	8	185	210	45	60.2399
POL003: 361 J	POL003: 361 J	43783	CARESSE	FRA	IIIB	1997----	162	173	191	200	82	9	1	25.8333	51	3	3	3	1	1	1	9	183	207	60.6667	59.5577
POL003: 227 J	POL003: 227 J	41902	PROCKTOR	GBR	IVA	1960----	164	179	191	200	73	9	1	21.4	44	3	3	3	1	1	1	6	186	210	73.3333	80.4799
POL003: 57 J	POL003: 57 J	40347	HUNTER	IRL	IVA	1968----	163	173	191	200	80	9	1	17.5	54.6667	3	3	3	1	1	1	6	177	207	61	63.2435
POL003: 52 J	POL003: 52 J	40319	GOLDEN ARCHER	GBR	IVA	1972----	163	176	191	200	85	9	1	16.9667	50.3333	3	3	3	1	1	1	7	183	207	75.6667	72.6599
POL003: 53 J	POL003: 53 J	40321	GOLDEN GRAIN	GBR	IVA	1972----		186	197	204	80	9	1	21.9667	47	3	3	3	1	1	1	6	183	210	75	85.362
POL003: 54 J	POL003: 54 J	40322	GOLDEN PHAESANT	GBR	IVA	1972----		179	199	200	85	9	1	19.5333	49.6667	3	3	3	1	1	1	6	183	207	79.3333	69.8152
POL003: 150 J	POL003: 150 J	40929	IMBER	GBR	IVA	1972----	164	173	191	200	70	9	1	20.6	47.6667	3	3	3	1	1	1	5	179.667	207	71.6667	86.5792
POL003: 67 J	POL003: 67 J	40387	OLD CROMARTY	GBR	IVA	1972----	156	179	191	200	80	9	5	32.6667	49	3	3	3	1	1	1	8	180.333	207	61.3333	85.1228
POL003: 69 J	POL003: 69 J	40389	OLD SCOTH	GBR	IVA	1972----	162	176	191	200	95	9	1	22.9333	42.3333	3	3	3	1	1	1	7	183	207	77.3333	68.8922
POL003: 24 J	POL003: 24 J	40230	ARCHER GOLDTHORPE	GBR	IVA	1972----	177	151	191	200	90	9	1	11.3333	55.3333	3	3	3	1	1	1	6	185	210	56.6667	58.6312
POL003: 27 J	POL003: 27 J	40238	BEAWENS ARCHER	GBR	IVA	1972----		173	191	200	80	9	1	10.9	47	3	3	3	1	1	1	8	185.667	210	66	47.9023
POL003: 33 J	POL003: 33 J	40261	CAMBRIDGE	GBR	IVA	1972----		180	197	204	65	9	1	10.8	45	3	3	3	1	1	1	8	185	210	60.6667	39.0441
POL003: 35 J	POL003: 35 J	40265	CHEVALIER II	GBR	IVA	1972----		179	191	200	82	9	1	19.5333	49.3333	3	3	3	1	1	1	5	186	210	60.3333	79.7156
POL003: 58 J	POL003: 58 J	40349	IRISCH GOLDTHORPE	IRL	IVA	1972----	155	173	191	200	85	9	5	40.5	43	3	3	3	1	1	1	5	174.5	207	64.5	43.6584
POL003: 68 J	POL003: 68 J	40388	OLD IRISCH	IRL	IVA	1972----	162	173	182	191	95	9	1	23.4667	52.3333	3	3	3	1	1	1	6	183	207	73.6667	60.45
POL003: 14 J	POL003: 14 J	40153	GOLDEN PROMISE	GBR	IVA	1974----	164	176	191	200	63	9	1	18.0333	41.6667	3	3	3	1	1	1	9	183	210	55.6667	56.4058
POL003: 122 J	POL003: 122 J	40598	FIRECREST	GBR	IVA	1978----	163	176	191	200	80	9	1	20.4667	48.3333	3	3	3	1	1	1	9	183	210	65.6667	46.7989
POL003: 124 J	POL003: 124 J	40600	GOLDMARKER	GBR	IVA	1978----	162	176	191	200	75	9	1	18.8333	43.3333	3	3	3	1	1	1	7	185.667	210	55.6667	56.011
POL003: 125 J	POL003: 125 J	40601	GOLDSPEAR	GBR	IVA	1978----	163	176	191	200	70	9	1	21.8667	44	3	3	3	1	1	1	9	185.667	210	55.3333	57.8879
POL003: 123 J	POL003: 123 J	40599	LUKE	GBR	IVA	1978----	163	176	191	200	75	9	1	14.0667	52.6667	3	3	3	1	1	1	8	179.667	207	67	51.8452
POL003: 126 J	POL003: 126 J	40602	MAGNUM	GBR	IVA	1978----		179	191	200	80	9	1	14.9667	52.6667	3	3	3	1	1	1	8	185	210	67	45.2576
POL003: 121 J	POL003: 121 J	40597	ABACUS	GBR	IVA	1978----	162	176	191	200	75	9	1	23.7	55.3333	3	3	3	1	1	1	6	185.667	207	75	66.6904
POL003: 246 J	POL003: 246 J	42730	DOUBLET	GBR	IVA	1986----	162	176	191	200	96	9	1	26.2	55.3333	3	3	3	1	1	1	6	186	210	61.6667	56.9788
POL003: 272 J	POL003: 272 J	43455	HOCKEY	GBR	IVB	1993----	162	179	182	191	75	9	1	18.7667	50.6667	3	3	3	1	1	1	8	179.667	207	65.6667	68.0224
POL003: 315 J	POL003: 315 J	43725	HERON	GBR	IVB	1996----	164	179	191	200	59	9	1	21.9333	51.6667	3	3	3	1	1	1	9	177	207	59.3333	67.2262
POL003: 288 J	POL003: 288 J	43692	OPTIC	GBR	IVB	1996----	163	176	191	200	72	9	1	25.2	48.3333	3	3	3	1	1	1	9	185.667	210	59.3333	120.498
POL003: 285 J	POL003: 285 J	43689	ABELONE	GBR	IVB	1996----	164	176	191	200	65	9	1	19.6667	44	3	5	3	1	1	1	9	183	210	59	68.8404
POL003: 286 J	POL003: 286 J	43690	AMBER	GBR	IVB	1996----	179	179	197	204	75	9	1	18.1	54	3	3	3	1	1	1	8	186	210	70.3333	89.8307
POL003: 324 J	POL003: 324 J	43735	COOPER	GBR	IVB	1996----		179	191	200	60	9	1	20.0333	43.3333	3	3	3	1	1	1	8	183	210	68	73.7944
POL003: 287 J	POL003: 287 J	43691	CORK	GBR	IVB	1996----	163	179	191	200	65	9	1	22.1667	49	3	3	3	1	1	1	8	185.667		56.6667	78.2516
POL003: 323 J	POL003: 323 J	43734	DRAUGHT	GBR	IVB	1996----		180	197	204	65	9	1	18.3	53.6667	3	3	3	1	1	1	7	185		63.6667	69.2664
POL003: 207 J	POL003: 207 J	41559	AGIO	NLD	VA	1960----	164	173	191	200	95	9	1	19.4333	47.3333	3	3	3	1	1	1	7	185.667	210	80	84.0758
POL003: 212 J	POL003: 212 J	41619	DELISA	NLD	VA	1971----	162	173	191	200	82	9	1	20.8667	45.3333	3	3	3	1	1	1	8	181	210	61
POL003: 140 J	POL003: 140 J	40821	EUROPA	NLD	VA	1972----	164	176	191	200	60	9	1	12.5	51.3333	3	3	3	1	1	1	6	175.333	207	75.3333	54.4371
POL003: 144 J	POL003: 144 J	40899	HASSAN	NLD	VA	1972----	162	173	191	200	65	9	1	18.8667	49.6667	3	3	3	1	1	1	5	185.667	207	64.3333	58.7509
POL003: 62 J	POL003: 62 J	40367	MAZURKA	NLD	VA	1972----	162	176	191	200	80	9	1	27.4667	49.3333	3	3	3	1	1	1	8	183	210	72.3333	69.005
POL003: 154 J	POL003: 154 J	40997	MIRANDA	NLD	VA	1972----	164	173	191	200	65	9	1	16.1333	52.3333	3	3	3	1	1	1	8	179.667	207	61.3333	58.0776
POL003: 66 J	POL003: 66 J	40386	OFIR	NLD	VA	1972----	160	173	191	200	80	9	1	22.4	44.6667	3	3	3	1	1	1	7	179.667	207	67.6667	46.7552
POL003: 174 J	POL003: 174 J	41330	ARAMIR	NLD	VA	1972----	162	176	191	200	80	9	1	23.0667	49.3333	3	3	3	1	1	1	7	180.333	207	71	65.4519
POL003: 28 J	POL003: 28 J	40239	BELFOR	NLD	VA	1972----	163	171	191	200	90	9	1	23.3333	51.3333	3	3	3	1	1	1		185	207	64.3333	62.5272
POL003: 138 J	POL003: 138 J	40798	DELTA	NLD	VA	1972----	162	176	191	200	70	9	1	12.7667	50	3	3	3	1	1	1	8	177	207	68	51.8206
POL003: 8 J	POL003: 8 J	40031	DIVA	NLD	VA	1975----	162	176	191	200	88	9	1	21.4667	55	3	5	3	1	1	1	8	177	207	66	59.1479
POL003: 113 J	POL003: 113 J	40585	FLAVINA	NLD	VA	1978----	163	176	191	200	80	9	1	16.0667	47.6667	3	3	3	1	1	1	8	185.667	207	80	50.3293
POL003: 114 J	POL003: 114 J	40586	BOLERO	NLD	VA	1978----	163	176	191	200	85	9	5	42.5333	46.6667	3	3	3	1	1	1	7	185.667	207	66.6667	64.2799
POL003: 115 J	POL003: 115 J	40587	CORNEL	NLD	VA	1978----	162	176	191	201	85	9	1	14.8	48.3333	3	3	3	1	1	1	7	179.667	207	60.6667	93.1126
POL003: 63 J	POL003: 63 J	40376	HAVILLA	NLD	VA	1979----	159	173	191	200	75	9	1	20.4	55.6667	3	3	3	1	1	1	9	179.667	207	65.6667	43.3699
POL003: 191 J	POL003: 191 J	41492	POLKA	NLD	VA	1981----	162	176	191	200	75	9	1	20.9667	46.6667	3	3	3	1	1	1	8	173.667	210	66	73.7834
POL003: 264 J	POL003: 264 J	43371	MAGDA	NLD	VB	1992----	159	176	191	200	75	9	1	20.7333	58.3333	3	3	3	1	1	1	7	173.667	207	57.6667	60.7881
POL003: 276 J	POL003: 276 J	43673	GROSSO	NLD	VB	1995----	163	173	191	200	70	9	1	21.6667	48.6667	3	3	3	1	1	1	6	173.667	207	62.6667	50.8678
POL003: 295 J	POL003: 295 J	43699	RAGTIME	NLD	VB	1996----	163	180	197	204	70	9	1	22.5333	52.6667	3	3	3	1	1	1	7	181	207	56.5	62.8923
POL003: 294 J	POL003: 294 J	43698	RIFF	NLD	VB	1996----	164	179	191	200	70	9	1	22.8667	47.6667	3	3	3	1	1	1	7	185.667	210	63.6667	103.748
POL003: 293 J	POL003: 293 J	43697	CYMBALO	NLD	VB	1996----	164	179	191	200	80	9	1	21.9667	50.3333	3	3	3	1	1	1	9	179.667	210	60.6667	90.6738
POL003: 142 J	POL003: 142 J	40856	GOLIAK	NOR	VB	1973----	162	171	191	200	65	9	1	18.8667	42.3333	3	3	3	1	1	1	4	173.667	207	62.5	72.5904
POL003: 117 J	POL003: 117 J	40593	VENA	NOR	VB	1978----	161	176	191	201	70	9	5	16.7667	43.6667	3	3	3	1	1	1	9	182.333	207	58	46.4121
POL003: 127 J	POL003: 127 J	40603	YRJAR	NOR	VB	1978----	158	171	191	200	70	9	5	48.9667	41.6667	3	3	3	1	1	1		178	207	46.3333	36.555
POL003: 248 J	POL003: 248 J	42789	VARDE	NOR	VB	1984----	159	171	191	200	75	9	5	49.1667	37.3333	3	3	3	1	1	1	3	179.667	207	62.5	54.3782
POL003: 283 J	POL003: 283 J	43687	OLSOK	NOR	VB	1996----	157	173	182	191	70	9	5	31	42.3333	3	3	3	2	1	1	9	173.667	207	43	54.6675
POL003: 282 J	POL003: 282 J	43686	OLVE	NOR	VB	1996----	158	173	182	191	80	9	1	19.4667	42.6667	3	3	3	1	1	1		175.333	207	60
POL003: 358 J	POL003: 358 J	43780	INARI	FIN	VB	1996----	162	176	191	200	75	9	1	23.4	55	3	3	3	1	1	1	8	180.333	207	61	67.426
POL003: 289 J	POL003: 289 J	43693	LOVIISA	FIN	VB	1996----	155	171	182	191	75	9	5	39.5333	41.3333	3	3	3	1	1	1		178	207	50	55.3508
POL003: 290 J	POL003: 290 J	43694	ARTTURI	FIN	VB	1996----	155	171	182	191	68	9	5	32.7	38.6667	3	3	3	1	1	1		173.667	207	42.5	63.0947
POL003: 359 J	POL003: 359 J	43781	VIIVI	FIN	VB	1997----	162	176	191	200	75	9	1	21.8333	53.3333	3	3	3	1	1	1	7	185	210	64.3333	60.3781
POL003: 211 J	POL003: 211 J	41585	BALDER	SWE	VIA	1960----	162	173	191	200	90	9	1	23.2333	48.3333	3	3	3	1	1	1	6	177	210	60.5
POL003: 30 J	POL003: 30 J	40258	BRITTA	SWE	VIA	1971----	161	173	191	200	90	9	1	19.1333	48.3333	3	3	3	1	1	1	8	180.333	210	61	53.7943
POL003: 143 J	POL003: 143 J	40860	GUNILLA	SWE	VIA	1972----	162	173	191	200	70	9	1	16.1333	48.3333	3	3	3	1	1	1	6	178	210	70	62.6439
POL003: 56 J	POL003: 56 J	40338	HEIMDAL	SWE	VIA	1972----	162	176	191	200	85	9	1	18.4	49	3	3	3	1	1	1	6	186	210	74	48.9883
POL003: 158 J	POL003: 158 J	41120	WING	SWE	VIA	1972----	164	176	191	200	80	9	1	18.4667	52.3333	3	3	3	1	1	1	9	185.667	210	71.6667	86.3888
POL003: 92 J	POL003: 92 J	40501	SIMBA	SWE	VIA	1977----	163	176	191	200	80	9	1	22.4333	51.6667	3	3	3	1	1	1	8	185.667	207	65.6667	60.5081
POL003: 111 J	POL003: 111 J	40581	HELLAS	SWE	VIA	1978----	162	176	191	201	70	9	1	13.3333	46.3333	3	3	3	1	1	1	9	182.333	207	68.6667	56.4571
POL003: 112 J	POL003: 112 J	40583	WELAM	SWE	VIA	1978----	163	176	191	200	75	9	1	15.8333	55.3333	3	3	3	1	1	1	8	185.667	207	77	51.2393
POL003: 109 J	POL003: 109 J	40578	AKKA	SWE	VIA	1978----	157	171	182	191	80	9	1	19.1	48.6667	3	5	3	1	1	1		175.333	207	67	51.6532
POL003: 110 J	POL003: 110 J	40579	CILLA	SWE	VIA	1978----	162	173	182	191	80	9	1	20.2333	51.3333	3	3	3	1	1	1	6	179.667	207	68.3333	60.1039
POL003: 245 J	POL003: 245 J	42427	YMER	SWE	VIA	1984----	162	176	191	200	85	9	1	24.8	52.3333	3	3	3	1	1	1	8	179.667	210	83.3333	67.5966
POL003: 247 J	POL003: 247 J	42774	BAMSE	SWE	VIA	1984----	159	171	191	200	87	9	5	39.0667	37.3333	3	3	3	1	1	1	7	177	207	57.5	85.6006
POL003: 394 J	POL003: 394 J	19I00600	BENTE	SWE	VIB	2019	163	179	191	200	70	9	1	25	56.6667	3	3	3	1	1	1	9	175.333	210	63.3333	61.2035
POL003: 351 J	POL003: 351 J	43773	EVITA	SWE	VIB	1996----	162	179	191	200	90	9	1	20.2667	50.6667	3	3	3	1	1	1	8	183	204	62.6667	60.1441
POL003: 333 J	POL003: 333 J	43746	GOLDIE	SWE	VIB	1996----		179	191	200	66	9	1	16.5333	50.6667	3	3	3	1	1	1		185	183.75	58	101.652
POL003: 319 J	POL003: 319 J	43729	GOTA	SWE	VIB	1996----	163	176	191	200	60	9	1	21.8667	52	3	3	3	1	1	1	8	179.667	210	56	97.366
POL003: 318 J	POL003: 318 J	43728	JILL	SWE	VIB	1996----	164	180	197	204	65	9	1	21.4333	51	3	3	3	1	1	1	8	185.667	210	61	69.0423
POL003: 342 J	POL003: 342 J	43763	LIMBO	SWE	VIB	1996----	163	171	191	200	65	9	1	20.0333	51.3333	3	3	3	1	1	1		174.5	183.75	59.5	54.4906
POL003: 298 J	POL003: 298 J	43702	MARGIT	SWE	VIB	1996----	163	176	191	200	75	9	1	21.4	48.3333	3	3	3	1	1	1	9	181	207	59	108.843
POL003: 343 J	POL003: 343 J	43764	MAUD	SWE	VIB	1996----	164	176	191	200	65	9	1	20.4333	45.3333	3	3	3	1	1	1		185		60	54.8587
POL003: 345 J	POL003: 345 J	43766	MELTAN	SWE	VIB	1996----	163	176	191	200	65	9	1	21.1667	53	3	3	3	1	1	1		177	204	48	54.8539
POL003: 344 J	POL003: 344 J	43765	MENTOR	SWE	VIB	1996----	164	176	191	200	70	9	1	16.4667	48.6667	3	3	3	1	1	1		181	183.75	61	55.5985
POL003: 320 J	POL003: 320 J	43730	MIE	SWE	VIB	1996----	163	176	191	200	70	9	1	23.4333	50	3	3	3	1	1	1	6	185.667	207	67
POL003: 350 J	POL003: 350 J	43771	OLGA	SWE	VIB	1996----	162	179	191	200	90	9	1	21.3	50	3	3	3	1	1	1	9	185.667	210	62.6667	63.8336
POL003: 321 J	POL003: 321 J	43731	ORJA	SWE	VIB	1996----	164	179	191	200	69	9	1	22.8667	48.6667	3	3	3	1	1	1	8	183	210	59.6667	77.4279
POL003: 348 J	POL003: 348 J	43769	PORJUS	SWE	VIB	1996----	164	176	191	200	70	9	1	20.8667	45	3	3	3	1	1	1	9	185.667	207	58	57.2482
POL003: 322 J	POL003: 322 J	43732	PORTIA	SWE	VIB	1996----	164	180	197	204	65	9	1	18.0667	51.6667	3	3	3	1	1	1	9	185.667	210	57.6667	55.1895
POL003: 299 J	POL003: 299 J	43703	SAXO	SWE	VIB	1996----	163	176	191	200	80	9	1	22.1333	42.6667	3	3	3	1	1	1	5	177	207	66.5	81.0417
POL003: 300 J	POL003: 300 J	43704	SIGNE	SWE	VIB	1996----	161	173	182	191	85	9	1	22.4667	53	3	3	3	1	1	1	8	173.667	207	77	71.3127
POL003: 301 J	POL003: 301 J	43705	SIRI	SWE	VIB	1996----	179	180	197	204	60	9	1	12	52.6667	3	3	3	1	1	1	8	183	210	71	82.8186
POL003: 346 J	POL003: 346 J	43767	TIRUP	SWE	VIB	1996----	164	176	191	200	70	9	1	23.1	47.3333	3	3	3	1	1	1		181	183.75	57.5	58.3569
POL003: 347 J	POL003: 347 J	43768	TOFTA	SWE	VIB	1996----	162	173	191	200	80	9	5	47.2	46								177	183.75	68.5	59.7238
POL003: 349 J	POL003: 349 J	43770	TREBAN	SWE	VIB	1996----	162	176	182	191	100	9	1	19.2667	50.6667	3	3	3	1	1	1	9	185.667	210	58.3333	57.1168
POL003: 302 J	POL003: 302 J	43706	VANJA	SWE	VIB	1996----	163	173	182	191	77	9	1	19.1333	53.3333	3	3	3	1	1	1	7	179.667	207	73.6667	85.2126
POL003: 364 J	POL003: 364 J	43791	MONARK	SWE	VIB	1997----	163	176	191	200	70	9	1	19.8667	52	3	3	3	1	1	1	9	175.333	207	65	59.2832
POL003: 365 J	POL003: 365 J	43792	SHIRLEY	SWE	VIB	1997----	163	173	191	200	70	9	1	17.8333	50.3333	3	3	3	1	1	1	9	177	207	61.6667	53.3974
POL003: 366 J	POL003: 366 J	43793	SUNNITA	SWE	VIB	1997----	162	173	191	200	80	9	1	22.6667	45.3333	3	3	3	1	1	1	9	175.333	207	64.6667	58.3937
POL003: 367 J	POL003: 367 J	43794	YNGVE	SWE	VIB	1997----	162	180	197	204	75	9	1	11.9	54	3	3	3	1	1	1	9	179.667	207	61.3333	49.5582
POL003: 268 J	POL003: 268 J	43418	EDGARD	un	VII	1993----	163	176	191	200	75	9	1	19.0667	59.3333	3	3	3	1	1	1	9	185.667	210	68.6667	82.5259
POL003: 357 J	POL003: 357 J	43779	KARATAY 94	TUR	VII	1996----	160	173	182	191	90	9	1	19.0667	58.6667	3	3	3	1	1	1	8	178	207	47.5	62.7657
POL003: 262 J	POL003: 262 J	43358	FUNNEN 2	PRK	VII	1987----	155	171	191	200	80	9	1	21.4333	53.3333	3	3	3	1	1	1	6	175.333	207	53.6667	39.9204
POL003: 34 J	POL003: 34 J	40262	MATA	NZL	VII	1978----	163	179	191	200	70	9	1	23.9333	44.3333	3	3	3	1	1	1	8	186	210	65.6667	96.3431
POL003: 153 J	POL003: 153 J	40993	MINAMI HADAKA	JPN	VII	1972----	159	173	191	200	60	9	5	30.1667	31.3333	3	3	1	1	1	1		185			0
POL003: 305 J	POL003: 305 J	43710	SAMSON	CAN	VII	1996----	162	173	191	200	85	9	5	44.9333	39.3333	3	3	3	1	1	1	5	183	207	58.6667	62.1022
POL003: 29 J	POL003: 29 J	40241	VANIER	CAN	VII	1978----	160	173	191	200	75	9	5	46.2333	38	3	3	3	1	1	1		177	178.5	62.3333	55.307
POL003: 42 J	POL003: 42 J	40301	DUCHBILL	CAN	VII	1972----	162	173	191	200	80	9	1	21.6667	51.3333	3	5	3	1	1	1	7	185.667	207	77.3333	52.7428
POL003: 93 J	POL003: 93 J	40502	BEACON	USA	VII	1977----	157	173	182	191	90	9	5	46.8	38	3	3	3	1	1	1	6	175.333	207	69.6667	38.3926
POL003: 32 J	POL003: 32 J	40260	CALIFORNIAN	USA	VII	1972	161	176	191	200	65	9	5	40.3333	47.6667	3	3	3	1	1	1	6	175.333	207	50	0
Total							162.424	175.616	190.977	199.863	78.1879	9		22.2423	49.5198							7.09119	180.483	207.682	66.8272	65.0739
