# Supplementary material
Source: MDPI journal article supplement (https://www.mdpi.com/2073-4395/12/9/2135)
Supplement: s1 [file s1 › Table S2.xlsx]

## Sheet: Suppl. Table S2
Supplementary Table S2. Summary statistic for the phenological stages.
				Year: 2019															Year: 2018
				Days to heading (DAY_HA)					Days to maturity (DAY_MAT)					Plants height (PLT_HGT)					Days to milk (DAY_MILK)						Days to maturity (DAY_MAT)						Plants height (cm) (PLT_HGT)
Country of origin	Group			Average	SD	CV (%)	Min.	Max	Average	SD	CV (%)	Min.	Max	Average	SD	CV (%)	Min.	Max	Average	accessions number	SD	CV (%)	Min.	Max	Average	accessions number	SD	CV (%)	Min.	Max	Average	accessions number	SD	CV (%)	Min.	Max
POL	old	I	A	161.527	1.70101	2.89344	156	164	190.826	2.61757	6.85166	182	197	85.619	8.33311	69.4408	65	105	179.987	52	3.36837	11.3459	174.5	187	208.398	52	1.61413	2.60541	204	210	72.4839	52	8.7936	77.3274	52.5	91
	modern		B	162.917	2.50814	6.29078	160	179	191.306	2.14286	4.59184	182	197	71.6122	7.44372	55.409	55	90	180.369	49	3.52056	12.3944	173.667	186	208.414	49	1.82277	3.3225	204	210	62.2723	49	5.69169	32.3953	50.4444	76
	landrace		C	162.162	0.50075	0.250751	162	164	190.919	1.8009	3.24324	182	197	83.5405	7.33559	53.8108	65	100	178.73	37	2.48183	6.15949	175.333	185.667	207.892	37	1.55963	2.43243	204	210	72.5901	37	6.25778	39.1599	58	82
CSK, DEU, DNK, AUT	old	II	A	162.483	2.73493	7.47983	157	179	190.802	2.78576	7.76044	182	197	82.7143	9.55253	91.2508	65	105	180.683	91	3.42657	11.7414	173.667	187	208.333	90	1.49906	2.24719	207	210	70.5916	91	8.64696	74.7699	40	90
	modern		B	162.807	2.28691	5.22995	157	177	191.458	3.54927	12.5973	182	200	71.0169	9.71755	94.4307	50	92	180.872	59	3.78599	14.3337	172	186	206.838	57	6.54116	42.7868	178.5	210	61.2331	59	5.75186	33.0839	47.5	74
FRA	old	III	A	162.467	0.833809	0.695238	161	164	191.2	3.29935	10.8857	182	197	83.6	9.48533	89.9714	60	97	180.619	14	3.42654	11.7411	177	185.667	208.286	14	1.54066	2.37363	207	210	69.7556	15	7.55006	57.0034	57.3333	83.6667
	modern		B	163.35	1.59852	2.55526	162	169	192.5	2.66557	7.10526	191	197	73.6	7.55611	57.0947	60	95	181.742	20	3.45585	11.9429	177	186	209.289	19	1.26179	1.59211	207	210	62.7028	20	6.35068	40.3311	45	71.3333
GBR, IRL	old	IV	A	162.812	4.59302	21.0958	155	177	191.5	3.17355	10.0714	182	199	79.9545	9.05789	82.0455	63	96	183.083	22	3.12345	9.75595	174.5	186	208.636	22	1.52894	2.33766	207	210	66.3409	22	7.71113	59.4616	55.3333	79.3333
	modern		B	165.833	6.49359	42.1667	162	179	191.375	4.65794	21.6964	182	197	67	6.30193	39.7143	59	75	183.125	8	3.25595	10.6012	177	186	209	6	1.54919	2.4	207	210	62.75	8	4.91111	24.119	56.6667	70.3333
NLD, FIN, NOR	old	V	A	162.25	1.34164	1.8	159	164	191	0	0	191	191	78.4375	9.67449	93.5958	60	95	180.854	16	3.93459	15.481	173.667	185.667	207.75	16	1.34164	1.8	207	210	68.1458	16	6.10278	37.244	60.6667	80
	modern		B	160.133	3.06749	9.40952	155	164	189	4.6291	21.4286	182	197	72.5333	4.29063	18.4095	65	80	178.222	15	4.19877	17.6296	173.667	185.667	207.6	15	1.24212	1.54286	207	210	56.7556	15	7.55505	57.0788	42.5	64.3333
SWE	old	VI	A	161.583	1.88092	3.53788	157	164	189.5	3.50325	12.2727	182	191	81	6.82242	46.5455	70	90	181.028	12	3.92212	15.383	175.333	186	208.5	12	1.5667	2.45455	207	210	68.7222	12	7.29755	53.2542	57.5	83.3333
	modern		B	163.6	3.31662	11	161	179	190.885	3.9327	15.4662	182	197	73.1538	9.81302	96.2954	60	100	180.66	26	4.16346	17.3344	173.667	185.667	203.07	25	10.0139	100.279	183.75	210	62.2564	26	5.96792	35.6161	48	77
other		VII		160.2	2.61619	6.84444	155	163	189.2	3.79473	14.4	182	191	77	10.0554	101.111	60	90	180.633	10	4.81369	23.1716	175.333	186	204.5	9	9.83616	96.75	178.5	210	61.5	9	9.9023	98.0556	47.5	77.3333
Total				162.424	2.60872	6.80544	155	179	190.977	3.01264	9.07603	182	200	78.1879	10.3075	106.245	50	105	180.564	431	3.63737	13.2305	172	187	207.741	423	4.13072	17.0628	178.5	210	66.6898	431	8.65247	74.8652	40	91
