# Supplementary material
Source: MDPI journal article supplement (https://www.mdpi.com/2073-4395/12/9/2135)
Supplement: s1 [file s1 › Table S3.xlsx]

## Sheet: Suppl. Table S3
Supplementary Table S3. Summary statistic for the spike and seeds traits.
Country of origin	Group			2019
				Seeds per spike (SPIKE_SEED)						TSW (g)						spike length (SPIK_LENGTH) [mm]							spike density (SPIKE_DEN)		lemma awn/hood (LEMMA_AWN)		Kernel covering (SED_COV)		glume colour (GLUM_CLR_1)		glume colour (GLUM_CLR_2)		seed colour (SED_CLR)		Row number (ROW_NUM)
				Average	accessions number	SD	CV (%)	Min.	Max	Average	accessions number	SD	CV (%)	Min.	Max	Average	accessions number	SD	CV (%)	Min.	Max		Min.	Max	Min.	Max	Min.	Max	Min.	Max	Min.	Max	Min.	Max	Min.	Max
POL	old	I	A	24.0188	52	8.65722	74.9475	10.2	48.3333	47.0324	52	5.08317	25.8386	28.6667	56.6667	65.2123	39	11.0073	121.16	46.4903	89.0953		1	5	1	3	1	3	1	4	1	4	1	4	1	5
	modern		B	21.9721	49	2.12276	4.50613	15.1333	26.8667	53.0408	49	4.81733	23.2066	33.6667	59	62.0644	45	17.3913	302.456		107.954		3	5	1	3	1	3	1	1	1	1	1	1	1	1
	landrace		C	21.109	37	2.80958	7.89374	14.4333	25.3	48.6577	37	2.97571	8.85485	41	55	64.7532	36	10.3472	107.064	46.8526	90.6366		3	5	3	3	3	3	1	1	1	1	1	1	1	1
CSK, DEU, DNK, AUT	old	II	A	21.2516	91	6.35546	40.3918	10.5333	48.6667	48.8645	91	4.29095	18.4123	34.3333	58.3333	61.8846	86	12.1428	147.447	33.5816	107.53		3	5	3	3	1	3	1	1	1	1	1	1	1	5
	modern		B	22.1267	58	3.9814	15.8516	10.95	43.5	52.0862	58	3.18106	10.1191	42	59.6667	72.5044	54	22.6213	511.724	46.5451	138.408		3	5	3	3	3	3	1	2	1	1	1	1	1	5
FRA	old	III	A	22.0644	15	2.74118	7.51404	16.8667	27.6	48.2222	15	4.00529	16.0423	41	53.3333	59.9298	15	8.57012	73.4469	46.6692	72.3352		3	5	3	3	3	3	1	1	1	1	1	1	1	1
	modern		B	22.915	20	1.53754	2.36403	19.6667	25.8333	50.1167	20	5.20939	27.1377	38.3333	56.3333	70.2753	18	19.7651	390.659	48.5668	108.925		3	5	3	3	3	3	1	1	1	1	1	1	1	1
GBR, IRL	old	IV	A	20.3742	22	6.84687	46.8796	10.8	40.5	48.6364	22	4.5378	20.5916	41.6667	55.3333	62.7015	22	14.433	208.311	39.0441	86.5792		3	3	3	3	3	3	1	1	1	1	1	1	1	5
	modern		B	20.5208	8	2.43297	5.91935	18.1	25.2	49.3333	8	4.02374	16.1905	43.3333	54	79.4663	8	18.2146	331.773	67.2262	120.498		3	5	3	3	3	3	1	1	1	1	1	1	1	1
NLD, FIN, NOR	old	V	A	20.8167	16	7.07457	50.0495	12.5	42.5333	49.4167	16	3.15642	9.96296	44.6667	55.6667	62.3283	15	13.5478	183.544	43.3699	93.1126		3	5	3	3	3	3	1	1	1	1	1	1	1	5
	modern		B	27.4311	15	10.6034	112.432	16.7667	49.1667	46.4	15	6.38351	40.7492	37.3333	58.3333	62.8445	14	17.2609	297.938	36.555	103.748		3	3	3	3	3	3	1	2	1	1	1	1	1	5
SWE	old	VI	A	20.8472	12	6.58941	43.4203	13.3333	39.0667	49.1111	12	4.46611	19.9461	37.3333	55.3333	62.2704	11	12.9567	167.876	48.9883	86.3888		3	5	3	3	3	3	1	1	1	1	1	1	1	5
	modern		B	21.1038	26	6.18364	38.2374	11.9	47.2	50.0128	26	3.24617	10.5376	42.6667	56.6667	67.5187	25	16.498	272.183	49.5582	108.843		3	3	3	3	3	3	1	1	1	1	1	1	1	5
other		VII		31.3633	10	11.9056	141.744	19.0667	46.8	46.1333	10	9.50659	90.3753	31.3333	59.3333	49.01	10	31.229	975.251		96.3431		3	5	3	3	1	3	1	1	1	1	1	1	1	5
Total				22.2334	431	6.25286	39.0983	10.2	49.1667	49.5144	431	4.81839	23.2169	28.6667	59.6667	64.7273	398	16.5695	274.549		138.408		1	5	1	3	1	3	1	4	1	4	1	4	1	5
