# Supplementary material
Source: MDPI journal article supplement (https://www.mdpi.com/2073-4395/12/9/2135)
Supplement: s1 [file s1 › Table S4.xlsx]

## Sheet: Suppl. Table S4
Supplementary Table S4. Significant marker-trait associations (MTAs) for days to plants heading stage (DH), days to plants milky-waxy stage (DMW), days to plants maturity stage (DM), days to plants harvest stage (DPH), lodging tendency (LT), spike density (SD), grain per spike (NGS) and 1000—grain weight (TGW).
No.	Trait	SNP ID	Chromosome	Alleles	SNP physical position	P. value
1	DH	3666499-51	1H	C/T	406371397	<0.0001
2	SD	8643788-45	1H	T/C	428066022	<0.0001
3	DM	3255057-30	1H	G/T	507543799	<0.0001
4	TGW	3259831-67	1H	T/C	508778158	<0.0001
5	SD	3925040-30	1H	G/A	534345006	<0.0001
6	DMW	3923207-47	1H	G/A	541729292	<0.0001
7	SD	3257920-60	2H	G/T	20101308	1
8	DM	7241263-17	2H	G/A	113061051	<0.0001
9	DPH	7241263-17	2H	G/A	113061051	<0.0001
10	SD	7241263-17	2H	G/A	113061051	0.9856
11	DH	6281653-13	2H	T/C	349355977	<0.0001
12	DMW	3263989-64	2H	A/C	637011205	0.0009
13	NGS	3258999-37	2H	C/T	642739684	<0.0001
14	SD	3263044-31	2H	G/T	645380350	0.0726
15	DM	3254985-49	2H	A/T	666362520	1
16	SD	3919939-58	2H	C/G	670466583	<0.0001
17	NGS	4175407-16	2H	A/G	716882950	<0.0001
18	DPH	3259540-42	3H	G/T	25247488	<0.0001
19	DPH	6428583-31	3H	G/C	26143638	<0.0001
20	SD	3919802-61	3H	C/A	536073672	<0.0001
21	DH	3920041-34	3H	G/A	553941251	<0.0001
22	NGS	3257813-56	3H	C/G	610149076	<0.0001
23	NGS	4169900-29	3H	T/C	627363482	<0.0001
24	SD	3265292-21	3H	T/A	655224431	1
25	DMW	4330011-38	4H	A/G	525752	0.0012
26	TGW	3259116-37	4H	C/G	23758285	<0.0001
27	TGW	3259285-19	4H	T/C	42225988	<0.0001
28	TGW	3255546-48	4H	C/T	48276826	<0.0001
29	SD	3919690-68	4H	G/T	53809661	1
30	DPH	3911638-8	4H	C/A	626998485	<0.0001
31	DPH	3263086-44	4H	C/T	633384044	<0.0001
32	NGS	4007047-28	4H	C/G	640339215	<0.0001
33	SD	6428694-40	5H	G/A	5561811	<0.0001
34	DH	3665400-65	5H	T/G	442288544	1
35	DM	3275297-11	5H	T/A	466659298	<0.0001
36	NGS	4197240-36	5H	G/T	471387523	0.0187
37	DPH	3919902-47	5H	G/A	495058620	<0.0001
38	DM	3256367-9	5H	G/A	516855809	<0.0001
39	DMW	5249836-44	5H	A/T	533643508	0.0022
40	NGS	3254699-51	5H	T/C	573766812	<0.0001
41	SD	3925388-12	6H	T/C	7982867	1
42	DH	4783175-45	6H	G/A	440684735	<0.0001
43	SD	3255466-35	6H	C/G	476341068	<0.0001
44	NGS	3259102-57	6H	C/A	477803696	<0.0001
45	NGS	3666159-40	6H	C/G	512554153	<0.0001
46	SD	3666233-29	6H	C/T	527063885	<0.0001
47	SD	3918801-14	6H	G/A	575423596	<0.0001
48	DMW	3663162-62	6H	A/C	577037072	0.0011
49	NGS	3666407-49	6H	T/G	577858368	<0.0001
50	SD	3273654-16	7H	C/G	656700378	1
51	NGS	3432657-27	7H	C/G	18132313	<0.0001
52	SD	4000231-15	7H	T/C	3431929	<0.0001
53	DPH	4173467-11	7H	G/A	50279834	<0.0001
	LT	3261949-26	7H	T/G	5,3423E+08	<0.0001
54	DMW	4175694-44	Un	A/C	103341541	<0.0001
