# Supplementary material
Source: MDPI journal article supplement (https://www.mdpi.com/2073-4395/12/9/2135)
Supplement: s1 [file s1 › Table S5.xlsx]

## Sheet: Suppl. Table S5
Supplementary Table S5. Significant marker-trait associations (MTAs) for plant height (PH).
No.	Trait	SNP ID	Chromosome	Alleles	SNP physical localization	P. value
1	PH	3254995-48	1H	C/A	507203218	0.0368
2	PH	3255467-46	1H	A/G	361648993	0.9349
3	PH	3255678-38	1H	G/C	342693822	0.0123
4	PH	3260178-52	1H	C/G	507630341	0.0033
5	PH	3261781-46	1H	T/C	480051115	0.0274
6	PH	3266696-42	1H	A/C	444895382	0.0035
7	PH	3432431-28	1H	C/T	507146812	0.0027
8	PH	3812010-31	1H	G/C	480729513	0.0306
9	PH	3911365-45	1H	G/A	368985776	0.8124
10	PH	3924215-36	1H	C/T	368983947	0.7372
11	PH	4007106-27	1H	T/A	87353500	0.5801
12	PH	4185320-25	1H	C/T	549809583	<0.0001
13	PH	6277030-36	1H	G/A	71789886	0.91
14	PH	6428385-17	1H	C/T	74876203	0.3383
15	PH	6429360-14	1H	C/T	361649059	0.9349
16	PH	3261705-42	2H	T/C	730572095	0.0054
17	PH	40365915-35	2H	T/C	727962967	0.0501
18	PH	3255089-30	2H	G/C	760930749	0.5893
19	PH	3260011-50	2H	G/C	645208241	0.085
20	PH	3258278-35	2H	G/A	585450047	0.5566
21	PH	3257861-7	2H	A/G	644674537	0.02
22	PH	3255699-5	2H	C/A	26309766	0.2046
23	PH	3257025-41	3H	C/T	623873156	<0.0001
24	PH	3432906-23	3H	T/G	173445890	0.7093
25	PH	3262436-46	3H	C/A	170362907	0.001
26	PH	3264911-34	3H	T/C	499675413	0.7285
27	PH	3255934-34	3H	G/T	79426100	0.8042
28	PH	5259243-13	3H	G/C	12019967	0.1564
29	PH	3263573-8	3H	G/A	73223701	0.7299
30	PH	3258192-12	3H	T/C	171916816	0.6979
31	PH	3257922-44	3H	C/T	517321013	0.1547
32	PH	3257337-34	3H	G/C	614049573	0.8243
33	PH	5249900-20	3H	T/C	662449058	0.2006
34	PH	3257010-12	3H	G/T	136348122	0.7788
35	PH	3262983-26	3H	G/A	136348056	0.6634
36	PH	3275553-13	3H	C/T	505121801	0.6185
37	PH	3255426-31	4H	G/A	601412984	0.014
38	PH	3259678-35	4H	A/G	556826711	0.034
39	PH	3664059-20	4H	G/A	40893043	0.8201
40	PH	3986088-26	4H	A/G	471099570	0.283
41	PH	3258230-31	4H	T/C	601620468	0.0291
42	PH	4007227-56	4H	G/A	557589410	0.2302
43	PH	3666329-17	4H	C/G	563498646	0.6477
44	PH	3924288-41	4H	A/G	36945544	0.0525
45	PH	3924288-41	4H	A/G	36945544	0.0525
46	PH	3263300-32	4H	C/G	633599121	0.0408
47	PH	3259355-23	4H	G/A	566116188	0.6369
48	PH	4006393-16	4H	G/T	566114961	0.6369
49	PH	3666116-13	4H	G/T	523376807	0.6384
50	PH	6269637-13	4H	G/C	238203452	0.8166
51	PH	7234046-32	4H	A/G	611682358	0.0629
52	PH	4782868-56	4H	A/G	252632881	0.0053
53	PH	3258674-67	4H	A/G	452973437	0.1049
54	PH	3665295-5	4H	C/G	582227037	0.2046
55	PH	3921400-33	4H	C/G	584503225	0.2046
56	PH	14350408-63	5H	T/C	453639849	<0.0001
57	PH	3255930-68	5H	A/G	492825515	0.941
58	PH	3255899-29	5H	G/A	547620852	0.1057
59	PH	3919490-5	5H	T/C	607876906	0.0037
60	PH	4172290-68	5H	C/T	571696954	0.1921
61	PH	3398368-6	5H	C/G	623060574	0.2411
62	PH	3928650-51	5H	C/T	609268146	0.0206
63	PH	4412663-35	5H	A/G	632739095	0.6252
64	PH	4016484-59	6H	C/T	575957280	0.4731
65	PH	4014720-26	6H	C/G	507992396	<0.0001
66	PH	3258138-16	6H	T/G	26033160	0.1708
67	PH	3256844-45	6H	A/C	460953429	0.0136
68	PH	3262188-15	6H	G/T	461192842	0.09
69	PH	3259768-10	6H	C/G	557705416	0.2046
70	PH	3432462-39	6H	G/T	554868208	0.2046
71	PH	3256924-59	7H	C/G	640189580	0.0028
72	PH	3920255-11	7H	G/A	553641369	0.6846
73	PH	3255351-31	7H	C/G	523574483	<0.0001
74	PH	6277097-23	7H	C/G	555109356	0.6846
75	PH	3258016-26	7H	G/C	518604386	0.535
76	PH	13142583-10	7H	G/A	556433100	0.6692
77	PH	3918497-64	7H	A/G	552832603	0.944
78	PH	3258158-68	7H	C/G	651487747	0.7876
79	PH	3255407-44	7H	T/C	469024071	0.2731
80	PH	3276476-28	7H	T/C	462394139	0.2731
81	PH	3261949-26	7H	T/G	534230127	0.3304
82	PH	7233792-6	7H	G/A	639797622	0.2307
83	PH	3256943-57	7H	A/T	587930928	0.9238
84	PH	3665375-18	Un	A/C	86914858	0.285
85	PH	7232960-34	Un	T/C	34638762	0.6393
86	PH	3255069-10	Un	G/A	42237495	0.6411
87	PH	3262905-51	Un	C/G	112475177	0.2959
88	PH	3256441-17	Un	C/A	80520730	0.6756
